# Supplementary material for: Comparative Room Burn Study of Furnished Rooms from the United Kingdom, France and the United States
Source: Springer Nature journal article supplement (doi:10.1007/s10694-019-00888-8), 2019-07-16
Supplement: MOESM1 [file 16938730]

## Sheet: 18-310ACC-GB1CNTRM
177	8	0
System ID:
Title:	Linked spectrum at 0.341 min.
Description:
Method title:	PRis	All gases except NO 2016
Tue Feb 12 21:19:38 2036 (GMT-05:00)	Tue Feb 12 22:19:45 2036 (GMT-05:00)
	Time	CO2	(+)CO2	CO	(+)CO	HCl	(+)HCl	HF	(+)HF	SO2	(+)SO2	NO2	(+)NO2	HBr	(+)HBr	HCN	(+)HCN
1	20.46	-22.29	25.92	19.34	9.98	-20.98	147.99	-7.71	5.26	3.75	13.35	0.73	39.2	-35.12	40.13	-1.89	2.46
2	40.84	-41.27	24.42	19.99	11.72	61.64	120.17	-7.63	4.51	-1.27	13.47	-0.99	37.39	-35.04	41.67	-0.96	2.26
3	61.22	-76.3	21.73	21.08	13.39	64.29	116.77	-8.65	4.19	3.11	13.96	-1.84	34.9	-36.31	40.96	-2.1	2.41
4	81.59	-76.6	18.38	23.25	16.55	20.86	124.09	-8.95	4.18	1.33	13.22	-1.45	34.22	-37.71	43.86	-1.05	2.47
5	101.98	-67.57	19.34	20.46	12.98	114	116.87	-8.79	4.37	1.25	15.79	-1.35	33.91	-39.1	42.09	-1.05	2.82
6	122.35	-67.57	20.14	19.78	12.96	94.84	116.77	-9.11	3.86	2.13	13.4	-1.49	33.65	-36.75	39.09	-2.09	2.28
7	142.75	-69.08	17.24	21.16	11.4	37.88	114.51	-9.39	4.29	2.74	15.84	-2.32	33.1	-39.05	40.99	-1.43	2.81
8	163.12	-42.83	17.78	26.02	15.95	104.11	115.18	-9.88	3.82	0.06	15.55	-2.19	31.68	-39.14	49.76	-0.58	2.68
9	183.5	-24.82	20.46	23.9	15.38	78.01	114.39	-9.98	4.19	-2.05	16.14	-2.35	30.18	-39.08	42.36	-0.61	1.99
10	203.87	-42.67	16.34	23.98	17.18	72.03	115.94	-10.89	3.81	5.21	16.07	-2.54	29.26	-40.45	41.38	0.28	2.47
11	224.25	-76.5	14.41	25.1	16.81	100.28	119.8	-11.12	3.84	4.87	16.32	-2.04	28.92	-40.15	52.55	-0.13	2.61
12	244.62	-84.06	14.99	22.41	15.8	65	113.76	-11.12	3.63	4.02	16.98	-1.45	29.2	-40.23	42.51	-0.35	2.67
13	265	-104.68	15.71	22.92	15.48	105.42	116.29	-11.59	4.02	5.35	18.53	-2.28	26.57	-41.13	55.19	0.48	2.14
14	285.39	-115.15	13.39	24.87	19.93	161.67	116.84	-11.94	3.51	3.02	19.68	-2.35	25.75	-40.1	43.16	0.15	2.14
15	305.76	-112.81	15.18	22.33	18.42	89.27	113.76	-12.11	3.5	2.05	17.51	-2.93	25.94	-42.22	45.53	0.49	2.64
16	326.14	-122.32	15.24	21.16	16.5	119.22	115.45	-12.51	3.43	4.58	17.75	-2.89	25.09	-42.55	43.96	0.38	2.16
17	346.52	-117.58	15.9	20.4	14.22	66.83	117.69	-13.02	3.42	2.67	17.88	-2.96	24.78	-42.86	40.3	1.17	1.98
18	366.92	-99.87	15.8	20.3	14.81	98.98	120.46	-13.43	3.49	1.58	19.17	-2.53	26.08	-43.37	48.48	0.58	2.07
19	387.29	-108.17	15.85	21.5	19.28	78.86	124.78	-13.82	3.46	4.95	19.6	-2.29	26.56	-44.65	46.01	0.29	2.02
20	407.67	-113.76	16.77	25.3	23.7	38.78	135.08	-14.05	3.53	6.33	20.22	-2.36	27.14	-44.88	43.66	-0.23	2.16
21	428.05	-122.02	14.17	23.78	21.34	82.92	127.47	-14.66	3.4	6.66	20.4	-2.46	25.87	-45.37	46	0.74	2.37
22	448.42	-124.73	13.11	23.42	19.25	108.08	145.02	-14.87	3.28	3.95	18.84	-2.78	24.92	-45.7	48.9	1.05	1.89
23	468.8	-110.51	12.41	24.97	23.86	177.41	150.23	-15.25	3.26	6.49	20.46	-2.01	26.1	-45.99	47.82	1.14	1.89
24	489.18	-104.43	13.64	24.49	21.15	135.79	150.99	-16.35	2.67	6.62	21.81	-1.78	27.1	-46.91	48.8	0.93	1.99
25	509.55	-108.16	13.48	26.13	23.29	131.04	159.93	-16.32	2.78	3.38	21.41	-1.74	27.27	-47.72	53.68	1.07	2.48
26	529.94	-113.87	14.23	27.96	25.43	105.99	145.99	-16.58	2.62	2.3	20.54	-2.94	24.1	-46.83	47.32	0.94	2.59
27	550.3	-109.16	11.65	23.94	21.79	158.85	159.68	-17.23	2.97	5.69	22.85	-2.81	24.05	-49.76	50.8	1.03	2.18
28	570.69	-103.34	11.35	24.07	22.33	49.18	143.96	-17.53	2.79	6.43	22.17	-2.31	24.23	-48.92	61.44	1.26	2.59
29	591.05	-93.61	11.95	24.95	24.06	102.89	178.43	-18.24	2.67	1.85	21.94	-2.14	23.87	-48.57	47.07	2.17	2.15
30	611.44	-85.29	13.72	23.91	20.04	66.76	145.32	-18.24	3.04	4.56	21.04	-2.32	24.43	-48.66	51.26	1.4	2.62
31	631.82	-100.35	14.11	23.98	20.67	152.14	171.63	-18.28	2.71	6.67	22.06	-2.56	23.59	-46.92	53.79	2.18	2.69
32	652.21	-77.61	13.1	25.71	24.25	187.97	202.31	-18.44	2.57	5.22	23.19	-2.69	22.32	-49.65	51.32	2.09	2.96
33	672.58	-72.32	13.32	23.71	24.93	131.73	215.42	-19.44	2.68	9.83	24.19	-2.14	22.47	-49.35	50.05	2.25	2.58
34	692.96	-82.59	13.41	26.07	25.1	95.59	197.2	-19.21	2.57	5.66	25.27	-2.49	21.55	-51.22	64.62	2.28	2.89
35	713.33	-81.42	12.39	25.52	24.4	189.6	171.39	-19.55	2.65	6.87	23.28	-3.4	21.09	-50.05	59.82	1.8	2.58
36	733.71	-82.32	14.49	26.11	27.52	113.35	173.89	-18.76	2.51	5.04	23.97	-3.64	20.78	-50.54	53.08	1.6	2.96
37	754.09	-35.79	11.97	25.69	25.24	94.99	157.05	-18.72	2.72	5.16	25.25	-3.7	19.68	-49.17	61.33	1.57	2.49
38	774.46	-76.83	11.81	22.36	22.45	90.61	161.72	-19.04	2.58	5.67	25.19	-4.03	20.21	-48.59	55.52	1.41	2.74
39	794.84	-43.43	11.99	28.51	29.58	159.5	184.93	-19.46	2.65	4.43	26.99	-3.75	19.78	-50.95	52.16	2.11	2.45
40	815.23	-76.07	15.36	24.79	27.22	142.65	178.11	-20.34	2.72	2.93	25.68	-4.16	18.96	-51.07	56.3	2.53	2.49
41	835.6	-62.16	11.51	26.63	28.55	101.16	197.1	-20.84	2.88	3.54	27.15	-4.13	18.34	-50.9	55.9	3.48	2.93
42	855.98	-27.57	10.04	27.4	31.67	139.02	200.65	-20.74	3.11	1.35	26.76	-4.1	18.46	-52.5	62.93	2.39	3.19
43	876.35	-13.58	9.63	26.75	27.7	69.25	185.34	-20.62	2.95	6.17	25.32	-4.5	18.09	-51.3	54.89	2.94	2.9
44	896.73	-2.59	10.53	25.65	25.42	76.36	174.94	-20.77	2.87	5.08	24.64	-4.28	17.74	-53.45	55.75	4.02	3.44
45	917.11	72.38	11.44	26.3	27.44	134.71	177.62	-20.63	2.84	6.61	24.39	-3.88	18.01	-53.02	61.12	3.19	2.86
46	937.5	59.8	9.94	25.85	27.2	176.25	238.97	-20.86	2.84	7.56	26.5	-3.57	18.38	-53.83	60.99	2.91	3.23
47	957.87	55.81	10.1	24.02	25.35	152.28	193.06	-20.64	2.99	6.12	25.82	-2.88	19.19	-53.12	61.49	3.28	3.06
48	978.25	1.16	9.67	26.79	29.1	109.31	209.3	-21.39	2.9	5.46	28.35	-2.51	19.71	-56.17	62.63	3.36	3.04
49	998.62	18.01	10.95	26.74	30.25	211.25	203.31	-22.04	3.07	6.14	26.94	-3.08	19.19	-56.57	64.77	4.68	4.02
50	1019	5.47	11.72	28.55	32.48	100.18	195.68	-22.13	3.53	6.52	26.86	-3.21	19.51	-55.41	58.8	3.56	3.3							note HCL numbers inflated by baseline actual conc 150 ppm
51	1039.4	12.8	10.86	28.17	31.78	191.44	229.71	-22.44	3	5.92	26.49	-3.7	19.08	-56.93	70.59	3.66	3.28
52	1059.75	14.51	10.71	28.65	34.45	187.75	206.14	-22.62	3.25	6.96	27.85	-4.25	17.8	-56.22	63.15	3.73	3.25
53	1080.15	38.41	10.81	32.15	34.73	171.22	213.58	-23.07	3.35	10.88	27.04	-4.41	17.01	-58.27	64.37	3.93	3.05
54	1100.52	57.3	10.23	31.25	36.16	192.91	260.7	-22.77	3.12	7.44	26.51	-4.35	16.05	-57.12	73.32	4.18	3.43
55	1120.92	63.65	9.54	33.09	37.44	192.07	231.88	-23.03	3.09	9.03	26.61	-3.98	15.93	-56.39	60.34	4.89	2.85
56	1141.28	31.56	9.55	30.52	35.21	191.3	253.82	-22.68	3.21	9.67	25.36	-3.72	15.65	-56.46	67.11	5.16	3.26
57	1161.67	63.52	9.75	32.26	39.54	166.14	205.4	-22.27	3.81	10.24	26.19	-2.71	15.67	-58.25	61.31	5.54	3.18
58	1182.03	90.46	10.69	33.8	43.19	161.12	247.04	-22.44	3.07	8.58	27.48	-2.63	16.13	-56.97	62.44	6.39	2.91
59	1202.42	126.2	13.82	33.95	44.32	187.56	217.61	-22.12	2.82	6.96	26.94	-2.62	16.69	-55.85	62.04	4.72	2.76
60	1222.79	85.92	10.11	31.24	40.52	178.81	185.27	-22.2	2.75	8.16	26.73	-1.77	17.28	-56.05	67.44	6.14	3.35
61	1243.19	104.73	12.3	34.67	44.91	184.4	235.41	-23.33	2.61	8.52	29.62	-1.67	16.82	-59.23	72.32	6.24	3.44
62	1263.55	138.92	14.19	31.62	43.23	267	241.08	-23.05	2.52	9	28.47	-1.47	16.28	-59.26	73.57	5.99	3.36
63	1283.94	123.85	13.04	27.76	37.91	166.76	242.53	-23.48	2.87	9.14	30.42	-1	16	-58.99	71.04	5.69	3.6
64	1304.3	180.42	17.33	35.79	43.78	223.69	228.19	-23.43	2.89	12.28	28.1	-0.71	15.18	-58.03	78.19	6.19	3.21
65	1324.69	220.17	19.21	38.36	50.05	182.99	233.62	-23.31	2.75	10.26	27.63	-0.49	12.48	-58.1	71.73	7.72	3.35
66	1345.06	252.33	26.96	36.72	52.15	257.07	251.31	-23.19	3.1	11.89	27.78	-1.53	10.57	-57.05	77.79	9.43	3.41
67	1365.46	330.47	42.94	34.5	48.67	196.14	227.52	-22.41	3.57	8.27	26.48	-3.01	12.05	-55.51	61.25	10.63	3.32
68	1385.82	443.16	66.02	45.89	64.99	279.1	247.07	-22.56	4.16	7.98	26.03	-3.57	18.71	-54.5	76.34	13.08	2.93
69	1406.21	670.47	96.65	57.05	77.09	406.04	302.67	-22.66	5.34	8.36	27.02	-5.07	29.62	-54.37	52.5	16.35	3.5
70	1426.58	2019.48	331.9	126.99	132.71	705.27	349.09	-24.13	10.16	3.44	26.24	-8.89	76.7	-52.96	53.83	28.97	3.28
71	1446.98	1350.82	223.09	102.12	130.46	589.55	308.94	-23.83	11.37	8.15	23.62	-11.26	90.93	-51.2	60.41	31.3	3.34
72	1467.34	1392.66	229.58	117.56	156.58	737.41	396.2	-25.06	14.4	8.9	23.83	-12.08	118.15	-51.53	55.32	38.47	3.87
73	1487.73	1807.91	301.28	156.7	190.22	880.21	403.48	-27.43	16.72	7.93	27.22	-11.76	143.17	-53.1	56.44	45.63	4.21
74	1508.09	3760.69	409.16	405.59	211.72	1178.04	619.92	-30.27	19.71	13.53	30.06	-11.42	164.46	-61.15	71.89	51.75	5.11
75	1528.48	63575.8	10509.1	1096.53	325.37	1615.06	1042.7	-76.18	39.93	126.31	73.69	6.18	313.08	-136.57	520.33	96.51	7.4
76	1548.85	104454	19805	501.24	425.43	1833.57	781.49	-57.59	49.47	128.23	48.94	4.91	403.38	-105.64	528.86	120.64	11.07
77	1569.25	127021	22673.5	3786.1	484.75	-797.56	1625.23	-90.97	57.26	203.31	92.22	21.74	446.61	-143.43	378.66	173.8	78.81
78	1589.63	137220	22571.8	5216	884.11	-1236.29	2013.53	-103.33	64.02	237.49	103.64	28.69	494.97	-150	267.29	185.76	72.76
79	1610	116571	19787.3	1870.65	318.31	451.02	1066.99	-79.12	66.55	163.32	68.51	17.11	519.44	-107.05	170.97	166.84	28.65
80	1630.38	106026	17463.1	2576.94	211.74	-28.62	4231.96	-85.76	69.66	157.35	117.9	24.78	537.61	-119.91	202.49	190.98	43.95
81	1650.75	165309	22811.8	22024.9	8570.82	-24937	28780.3	-168.97	82.63	310.63	386.99	78.07	575.26	-259.76	526.32	232.59	41.13
82	1671.13	177176	20444.9	30604.7	13934.8	-30114.9	35020.1	-124.1	87.77	240.42	475.18	78.76	620.46	-187.07	484.07	265.45	31
83	1691.5	163850	18021.4	29537.1	13305.3	-28212.8	32784.1	-96.22	89.47	159.79	420.83	69.54	648.78	-134.85	397.13	274.74	28.97
84	1711.9	152838	16953.4	31720.2	14571	-30632.6	34464.4	-89.28	91.54	145.74	443.25	70.2	667.76	-124.26	404.29	246.06	26.71
85	1732.26	140781	16933.6	41254.3	20681.2	-39301.7	43511.6	-95.28	96.17	174.08	621.44	82.7	677.2	-141.38	535.13	257.44	26.16
86	1752.65	139777	17243.7	38419.8	18759.6	-34807.5	38584.9	-94.05	97.52	152.24	522.59	79.11	700.29	-132.63	466.24	243.24	25.69
87	1773.01	139717	17591.1	18787.8	6742.56	-13354.7	17439	-89.6	102.15	108.17	189.34	62.3	757.76	-96.46	233.23	238.67	27.68
88	1793.4	146624	16700.6	15113.9	4908.51	-9621.27	12854.2	-89.24	104.23	313.97	124.57	60.91	776.84	-90.92	191.33	240.17	27.88
89	1813.77	149593	18235.1	9979.71	2502	-3828.56	5595.85	-90.48	105.39	1266.72	86.09	59.71	789.34	-84.46	154.19	246.34	27.56
90	1834.17	143648	17799.5	7691.5	1559.82	239.59	1578.41	-92.01	108.09	1398.66	72.13	58.63	804.98	-84.21	133.55	254.88	27.74
91	1854.53	141395	19486.6	4157.73	429.66	2500.18	1069.44	-93.39	110.05	3546.28	96.13	59.43	817.2	-82.19	137.2	261.84	27.98
92	1874.92	131759	21395.1	1322.94	711.36	3567.47	1399.36	-94.1	112.17	2628.81	87.38	58.37	827.41	-83.8	130.13	273.19	28.4
93	1895.29	130178	21757.8	647.66	857.76	3826.8	1529.31	-95.48	113.65	1248.07	70.51	60.08	836.29	-83.9	130.32	274.22	28.99
94	1915.69	122902	21556.1	491.61	906.7	4076.41	1659.93	-97.77	119.19	916.3	68.36	61.36	866.11	-85.8	135.37	283.08	30.52
95	1936.05	120613	21262.9	447.84	922.16	4037.94	1691.46	-98.92	121.02	823.15	65.61	62.95	880.69	-86.8	138.55	287.79	31.16
96	1956.44	112853	19710.3	577.19	1250.9	5563.3	2829.07	-155.59	152.49	658.63	121.78	150.29	984.1	-165.25	272.76	359.83	42
97	1976.8	97649.5	16102.9	997.83	2267.98	11845.3	7350.63	-319.59	270.01	593.24	249.93	467.57	1337.95	-328.92	611.85	650.98	101.49
98	1997.19	110369	19517.9	491.46	1104.09	5915.71	2865.62	-123.2	143.26	461.15	78.63	94.58	1007.97	-105.92	181.85	340.29	39.1
99	2017.56	108147	19283.7	426.02	956.04	4804.23	2314.62	-110.8	122.66	487.85	76.77	67.16	899.25	-103.67	174.78	292.19	31.67
100	2037.96	107338	19115.8	425.44	966.06	4681.17	2217.83	-112.52	124.22	447.78	75.45	68.44	910.25	-102.56	170.05	296.4	32.35
101	2058.32	102687	18276	426.42	985.78	4777.6	2252	-116.34	126.68	534.41	77.35	69.55	926.16	-105.04	170.88	301.85	32.98
102	2078.71	100026	17754.8	427.93	999.89	4736.88	2249.45	-117.3	127.31	649.87	77.08	70.26	932.25	-104.77	179.38	304.24	33.42
103	2099.07	90064.3	15822.6	415.84	979.56	4639.09	2194.68	-116.33	124.65	408.96	77.52	64.04	916.03	-105.48	178.16	296.23	32.29
104	2119.46	57646.1	9573.39	1032.5	2408.01	12973.2	8781.06	-379.68	264.44	403.86	331.87	479.14	1324.58	-431.75	885.73	628.05	93.97
105	2139.84	57653	9320.96	432.05	1029.38	5857.66	3039.73	-126.46	130.09	163.31	80.81	68.72	940.4	-121.72	208.86	307.77	33.53
106	2160.23	47515.6	7194.32	409.34	962.23	4933.97	2571.39	-120.36	120.4	119.54	77.4	53.75	887.47	-117.62	198.83	284.25	30.29
107	2180.59	42582.1	6169.14	412.34	953.69	4670.09	2469.5	-121.97	118.5	105.25	80.95	50.3	875.14	-121.46	208.33	278.48	29.33
108	2200.98	46842.5	7015.05	429.44	949.42	4538.77	2399.8	-122.84	117.44	102.55	80.05	49.45	867.37	-123.01	212.11	276.29	29.15
109	2221.34	41947.9	6030.78	449.5	951.48	4467.6	2342.42	-124.86	115.89	90.78	82.65	47.75	858.92	-124.65	217.19	272.71	28.58
110	2241.73	38138.2	5205.96	497.29	939.69	4411.27	2284.74	-125.57	114.4	83.66	86.33	44.11	847.37	-126.59	223	266.68	27.62
111	2262.13	32252.7	4080.7	599.62	923.51	4162.17	2216.38	-126.53	111.57	80.29	85.56	40.28	830.93	-127.89	227.69	261.97	26.82
112	2282.5	34739.1	4454.62	701.01	907.26	4122.62	2198.88	-127.12	109.37	80.48	90.15	39.36	818.96	-132.75	231.46	257.07	26.07
113	2302.88	33033.3	4080.37	929.11	870.8	4010.91	2149.91	-127.63	106.8	80.22	91.98	37.05	807.63	-133.55	235.2	254.32	25.66
114	2323.26	30626.6	3637.14	1165.23	820.26	3939.64	2118.76	-127.44	103.84	81.8	91.69	34.01	796.4	-134.53	233.31	251.41	24.63
115	2343.65	28181.4	3228.61	1343.54	781.65	3875.31	2098.63	-126.84	103.17	80.19	91.96	32.21	784.59	-134.89	237.96	250.41	24.48
116	2364.01	25965.2	2905.65	1389.97	760.71	3706.29	2096.72	-126.7	101.15	76.6	94.47	30.96	771.14	-137	236.74	247.41	23.95
117	2384.4	26675.7	2973.76	1398.92	747.25	3726.15	2081.98	-125.83	99.31	78.33	93.89	28.69	759.71	-137.87	237.64	244.25	23.63
118	2404.76	29239.1	3326.13	1478.12	725.5	3687.26	2036.62	-126.25	98.61	77.69	94.13	28.57	752.94	-137.95	234.09	243.3	23.48
119	2425.15	28896.8	3275.91	1498.73	711.94	3550.69	2072.52	-126.23	96.9	79.23	93.85	27.89	740.8	-139.64	239.42	237.68	23.17
120	2445.51	25020	2753.22	1406.74	713.49	3486.62	2071.36	-126.97	93.82	74.18	98.31	26.56	719.27	-142.86	243.17	230.09	21.91
121	2465.9	22851.7	2466.36	1390.54	701.98	3429.37	2153.84	-126.43	91.02	73.77	100.04	25.07	698.15	-144.64	240.32	222.62	21.11
122	2486.26	24299.4	2657.42	1435.45	683.23	3421.57	2261.57	-127.89	89.21	78.3	103.6	26.6	685.78	-149.32	243.51	219.6	20.13
123	2506.65	23078.1	2493.78	1426.06	666.01	3363.25	2324.56	-126.63	86.94	76.99	104.8	25.73	666.51	-149.74	248.79	213.28	19.99
124	2527.03	20759.5	2233.57	1459.45	636.04	3403.44	2503.6	-126.54	83	76	106.41	24.41	644.04	-152.43	253.1	204.91	19.28
125	2547.42	16960.8	1877.42	1354.03	638.71	3162.33	2551	-127.71	79.35	80.22	109.85	22.79	613.84	-160.59	264.16	196.04	17.49
126	2567.78	16326.4	1809.4	1296.6	628.7	3107.43	2565.39	-126.06	75.61	80.85	111.92	20.75	591.48	-160.85	265.3	186.84	17.39
127	2588.17	16433.2	1771.48	1344.91	593.51	2943	2514.58	-125.11	71.38	76.03	115.54	19.78	566.01	-164.01	271.69	178.77	15.54
128	2608.55	15743.2	1695.09	1357.71	560.84	2770.32	2418.56	-123.04	66.64	81.81	114.93	18.38	533.89	-163.64	286.09	167.67	14.79
129	2628.94	14042.6	1562.31	1188.32	556.21	2597.27	2308.53	-122.4	62.46	78.06	116.31	16.68	505.24	-167.6	275.84	157.26	13.01
130	2649.3	13063.2	1468.47	1045.54	551.61	2506.51	2256.68	-121.55	59.2	78.58	119.6	17.36	479.04	-170.68	293.35	148.58	11.29
131	2669.69	12365.6	1386.93	977.55	518.45	2329.97	2249.32	-119.15	53.12	77.83	123.08	17.37	433.36	-173.56	296.26	133.93	9.71
132	2690.05	11742.7	1325.14	922.37	497.27	2249.04	2226.09	-115.8	47.89	76.97	121.07	16.04	395.54	-173.34	291.87	123.71	8.21
133	2710.44	11763.3	1333.23	899.98	479.03	2013.19	2108.6	-112.83	45.1	74.4	121.61	15.82	369.62	-172.38	295.83	115.8	7.51
134	2730.82	4250.6	277.42	332.08	256.83	1074.85	1737.73	-99.88	12.41	74.68	120.87	20.74	49.43	-175.78	289.72	31.58	4.91
135	2751.19	-497.84	90.52	98	76.04	571.27	1689.58	-109	15.78	92.31	141.75	33.12	221.67	-207.96	354.2	-31.47	17.89
136	2771.57	-535.79	76.27	108.98	79.12	792.68	1774.33	-114.46	16.04	97.65	151.23	36.21	232.03	-221.55	374.58	-30.94	19.98
137	2791.96	-523.6	73.57	109.14	81.67	755.22	1837.47	-117.2	16.31	97.81	156.97	37.91	235.6	-226.32	394.58	-32.33	19.32
138	2812.32	-511.17	69.95	111.78	84.67	746.56	1859.79	-119.97	16.4	101.61	160.37	38.45	237.76	-234.55	398.98	-32.29	19.36
139	2832.71	-517.64	74.03	111.87	82.68	683.8	1872.02	-120	16.6	101.93	160.22	38.19	240.21	-234.11	400.64	-33.14	19.76
140	2853.07	-519.95	75.43	116.5	89.41	759.6	1865.25	-120.07	17.11	98.51	161.55	38.67	243.52	-233.13	401.31	-32.77	19.68
141	2873.46	-526.22	77.68	113.23	83.47	729.02	1859.75	-119.99	17.56	101.29	159.37	38.91	247.25	-233.15	398.13	-34.09	19.18
142	2893.84	-540.12	83.44	113.82	80.66	742.34	1830.26	-118.86	17.12	99.66	157.77	38.27	249.37	-227.53	390.48	-34.46	18.1
143	2914.23	-527.86	79.34	113.32	81.79	743.99	1822.18	-119.84	17.07	100.56	160.04	39.2	251.62	-232.28	398.97	-34.99	19.2
144	2934.59	-523.26	79	112.27	79.09	731.76	1838.12	-120.35	17.7	104.86	162.32	39.82	253.61	-236.62	396.3	-34.83	19.19
145	2954.98	-517.89	77.73	119.61	90.55	739.6	1890.61	-121.51	17.42	105.33	164.66	41.09	255.77	-239.65	419.44	-34.8	18.31
146	2975.34	-504.51	76.24	124.87	99.39	727.2	1881.73	-123.17	17.24	106.89	172.64	44.15	257.52	-247.82	422.45	-34.94	19.13
147	2995.73	-503.74	75.38	118.72	92.78	717.82	1911.91	-123.31	17.98	109.27	172.15	44.85	258.98	-248.89	437.4	-35.4	18.88
148	3016.11	-498.45	73.86	122.76	97.87	726.95	1926.26	-123.12	18.05	112.64	171.49	45.04	260.06	-247.93	431.32	-35.21	19.04
149	3036.5	-500.24	74.03	124.2	98.03	797.44	1927.99	-123.99	18.09	114.5	171.88	45.08	261.64	-248.97	439.99	-35.36	18.54
150	3056.88	-499.28	76.16	122.19	97.54	767.7	1941.23	-124.71	18.09	113.05	173.87	45.59	264.29	-249.78	437.44	-35.49	19.16
151	3077.26	-494.57	76.19	124.71	99.45	783.59	1950.18	-125.51	18.2	113.49	176.72	46.46	267.48	-254.02	444.55	-36.21	18.84
152	3097.65	-495.73	78.24	127.31	101.62	794.82	2003.24	-127.25	18.19	118.25	179.79	48.12	271.19	-257.84	452.32	-37.41	18.37
153	3118.01	-492.88	79.2	131.01	105.88	808.02	1949.25	-129.19	19.28	118.61	181.26	47.99	275.47	-262.12	454.63	-37.78	18.16
154	3138.4	-488.56	82.39	131.17	108.37	809.15	1979.93	-131.35	18.57	119.92	187.91	49.06	278.14	-265.56	478.53	-37.08	17.9
155	3158.76	-483.31	80.57	133.54	112.22	810.03	2018.7	-131.7	18.94	123.75	188.25	49.67	279.73	-266.58	481.47	-37.84	17.35
156	3179.15	-476.5	79.25	135.52	115.59	779.23	2009.67	-132.08	18.67	123.14	189.76	50.56	280.45	-270.66	479.48	-37.38	17.94
157	3199.53	-469.71	80.31	141.69	124.08	787.87	2062.46	-132.35	18.94	123.88	192.15	50.66	280.64	-273.69	485.33	-37.73	18.28
158	3219.92	-468.03	79.11	139.42	121.35	768.61	2046.49	-132.97	19.41	123.42	191.84	49.76	280.96	-274.94	480.5	-37.39	18.12
159	3240.28	-463.23	79.13	142.21	127.19	863.21	2113.67	-134.2	18.68	126.1	194.97	50.5	282	-277.5	502.23	-37.84	17.62
160	3260.67	-463.88	83.23	142.09	126.88	865.18	2092.86	-134.77	18.34	126.54	196.23	51.07	283.14	-279.95	503.98	-37.8	17.6
161	3281.05	-459.61	82.37	144.48	131.1	857.47	2095.54	-136.21	18.56	129.08	197.17	50.76	283.79	-282.86	503.81	-37.03	17.17
162	3301.44	-465.64	85	140.02	123.49	826.77	2093.36	-136.56	18.97	128.61	195.69	50.31	283.9	-282.09	494.63	-37.2	18.08
163	3321.8	-469.39	82.85	141.15	123.84	771.48	2086.35	-136.24	18.8	128.02	196.38	49.38	284.36	-280.38	493.48	-37.95	16.38
164	3342.19	-477.09	87.84	143.08	127.09	868.65	2054.97	-137.17	18.64	128.58	197.69	48.41	284.42	-279.96	499.71	-37.57	18.38
165	3362.57	-460.36	81.23	144.85	129.82	917.24	2113.3	-137.95	19.09	126.47	196.05	48.83	284.9	-281.66	500.52	-37.64	18.07
166	3382.96	-467.98	85	145.7	129.68	806.23	2127.48	-138.2	18.61	129.95	199.38	49.42	285.31	-282.79	503.49	-37.41	17.89
167	3403.32	-458.81	86.31	144.63	131.12	830.36	2119.38	-138.57	18.94	129.65	199.38	49.65	284.93	-283.8	507.85	-38.04	17.89
168	3423.71	-458.77	81.64	147.39	132.64	824.51	2140.65	-138.29	18.33	131.45	201.53	49.71	285.35	-283.7	505.59	-38.07	17.8
169	3444.09	-460.73	81.81	144.52	129.08	831.23	2060.63	-137.91	18.58	131.52	199.43	49.9	285.77	-283.74	500.08	-37.21	18.26
170	3464.48	-461.82	82.8	146.75	129.75	842.29	2093.22	-136.17	18.77	129.53	198.26	50.2	285.85	-282.65	497.51	-37.63	17.32
171	3484.84	-467.27	84.01	145.34	130.75	762.18	2047.31	-135.58	18.79	129.14	197.23	50.09	285.8	-278.64	508.62	-37.79	16.69
172	3505.23	-466.38	82.23	141.37	123.99	857.41	2101.2	-135.54	18.85	128.83	195.71	49.81	285.97	-279.98	498.73	-38	16.56
173	3525.59	-479.68	89.23	141.16	125.97	858.65	2060.37	-134.92	18.59	129.74	196.11	49.93	286.09	-279.43	491.09	-37.2	17.31
174	3545.98	-461.14	81.46	140.58	124.4	848.75	2104.7	-135.45	18.59	128.97	196.74	50.42	286.52	-279.4	507.78	-38.19	17.09
175	3566.36	-475.35	84.18	140.94	122.16	792.38	2064.08	-135.05	18.66	126.82	195.8	49.18	286.31	-277.7	478.76	-38.07	17.43
176	3586.75	-470.34	81.64	140.52	124.6	801.21	2027.25	-135.15	19.06	124.11	195.64	48.8	286.45	-275.17	486.19	-37.73	17.33
177	3607.13	-470.49	83.3	142.32	122.38	793.42	2034.66	-136.77	19.02	125.03	196.04	49.28	286.22	-277.58	492.69	-37.96	17.32
