# Supplementary material for: Comparative Room Burn Study of Furnished Rooms from the United Kingdom, France and the United States
Source: Springer Nature journal article supplement (doi:10.1007/s10694-019-00888-8), 2019-07-16
Supplement: MOESM4 [file 16938730]

## Sheet: 18-310ACC-US1-Door
Version=1
NumMeasures=000177
NumComponents=8
Usage=0
SystemID=
Title=Tue Nov 06 09:16:40 2018 (GMT-06:00)
Description=
NumMethods=1
MethodNumComponents1=8
MethodTitle1=PRis	All gases except NO 2016
NumLimits=0008
UseLimit=0	0	0	0	0	0	0	0
LowerLimit=0.000	0	0	0	0	0	0	0
UpperLimit=0.000	0	0	0	0	0	0	0
StartTime=06Nov18092757
EndTime=06Nov18102754
DataTable
Sequence	Time	CO2	(+)CO2	CO	(+)CO	HCl	(+)HCl	HF	(+)HF	SO2	(+)SO2	NO2	(+)NO2	HBr	(+)HBr	HCN	(+)HCN
		ppm	(+)ppm		ppm	(+)ppm	ppm	(+)ppm		ppm	(+)ppm	ppm	(+)ppm	ppm	(+)ppm		ppm	(+)ppm	ppm	(+)ppm	ppm	(+)ppm	ppm	(+)ppm		ppm	(+)ppm	ppm	(+)ppm	ppm	(+)ppm	ppm	(+)ppm	ppm	(+)ppm		ppm	(+)ppm	ppm	(+)ppm	ppm	(+)ppm	ppm	(+)ppm	ppm	(+)ppm	ppm	(+)ppm
1	20.46	97.99	145.64	13.1	6.04	-226.7	224.55	-1.18	8.29	9.74	9.1	-4.12	59.99	-24.61	65.97	-10.29	1.88
1	40.78	97.8	148.31	15.62	8.02	-386.27	262.82	-2.66	5.74	4.84	9.46	-0.42	62.57	-28.89	61.82	-9.48	1.71
1	61.1	111.8	156.52	28.68	21.95	-204.87	338.46	-0.74	5.99	0.34	16.55	-1.68	61.81	-31.35	87.4	-8.15	2.44
1	81.43	100.42	155.23	14.6	5.15	-354.24	322.57	-0.23	5.52	2.94	19.64	-1.1	60.66	-34.69	81.7	-10.87	2.16
1	101.75	103.72	150.69	14.37	5.82	-377.01	298.39	-1.69	6.37	0.86	10.58	-3.22	60.44	-27.23	81.64	-7.68	1.65
1	122.07	112.99	136.29	9.29	19.07	-158.68	321.71	-3.01	6.72	0.91	12.48	-3.51	58.92	-29.34	61	-6.12	3.28
1	142.39	98.3	151.77	18.88	8.74	-399.54	444.82	-2.06	5.9	8.88	10.05	-0.79	61.1	-29.23	87.96	-5.53	3.75
1	162.72	132.45	140.37	15.06	7.35	-326.88	288.4	-1.29	4.71	-2.23	9.12	-2.4	59.73	-29.56	59.58	-3.89	2.2
1	183.04	303.91	504.77	5.49	8.98	-334.32	284.44	-1.18	5.31	-4.67	11.21	-4.42	57.6	-30.26	96	-9.01	2.12
1	203.36	611.05	724.75	12.36	11.02	-193.89	295.61	-1.63	6.56	-9.51	9.2	-1.73	60.78	-29.01	104.96	-6.65	1.72
1	223.68	2186.67	772.58	40.92	12.19	-152.06	319.86	-3.12	6.08	-6.23	10.76	-3.9	59.34	-30.61	85.05	-8.37	2.14
1	244.01	5676.33	7100.76	68.21	42.64	-269.2	397.27	-2.03	6.68	4.88	15.8	-2.85	59.7	-36.77	68.1	-7.09	1.79
1	264.33	13593	15253.6	168.84	91.47	-289.06	330.16	-4.33	5.63	9.5	14.11	0.24	59.14	-37.47	77.38	-6.41	4.05
1	284.65	67189.7	203437	452.18	123.86	71.09	328.36	-7.14	5.9	1.34	18.55	2.46	57.36	-40.32	72.18	-3.79	14.94
1	304.98	59246.8	276712	609.48	125.07	-211.3	426.85	-5.77	5.66	17.95	13.35	0.56	52.54	-38.61	57.2	-0.35	19.31
1	325.3	25062.1	208060	582.07	112.79	69.43	448.71	-4.32	5.18	1.01	22.2	1.01	48.75	-33.26	91.38	-0.3	20.67
1	345.62	35106	22062.8	751.01	97.79	148.76	775.47	-6.74	6.3	10.34	14.64	0.82	45.52	-39.22	59.4	9.39	24.15
1	365.95	35106	22062.8	969.31	97.84	263.2	969.63	-6.55	5.69	6.97	14.44	2.54	40.74	-42.31	83.45	9.47	29.64
1	386.27	37665.7	54641.7	1168.15	142.19	152.85	881.73	-6.52	6.27	1.37	15.3	11.22	38.54	-37.63	61.67	14.85	31.17
1	406.59	35106	22062.8	1811.47	461.49	590.05	1733.72	-6.63	3.42	14.75	26.72	41.94	32.64	-35.58	82.49	24.91	34.42
1	426.92	35106	22062.8	14428.8	9794.63	32511.5	82194.5	-16.81	3.29	104.72	204.92	78.19	34.23	-78.66	157.86	124.48	671.83
1	447.24	35106	22062.8	23528.5	19771.8	53649.1	168511	-25.78	10.61	129.83	328.85	87.19	16.03	-106.18	407.45	749.96	1688.43
1	467.56	20296.7	145095	25964.6	22674.4	66236.5	218407	-33.06	14.63	143.97	526.04	97.28	51.4	-121.72	912.18	864.36	3396.41
1	487.88	35106	22062.8	30695.8	28499	74241.5	252763	-43.24	25.16	180.72	697.01	121.07	121.19	-141.97	827.94	421.91	3828.65
1	508.21	35106	22062.8	34193.6	33032.1	84409.2	282206	-53.7	33.94	209.94	877.45	187.84	203.74	-165.63	975.19	464.42	3995.14
1	528.53	35106	22062.8	35384.8	34314.2	83683.7	290539	-59.54	38.93	222.7	945.34	240.74	299.46	-170.78	1207.07	1009.87	4555.69
1	548.85	35106	22062.8	24848.6	21392.6	62155.7	222918	-49.74	37.55	117.09	551.05	224.99	386.89	-122.85	854.45	1104.33	3197.73
1	569.17	35106	22062.8	21807.1	18079.9	50683.9	191787	-43.52	40.86	87.39	397.9	183.53	426.48	-92.84	587.61	928.65	2547.52
1	589.5	35106	22062.8	25896.9	22590.9	56473.7	214336	-43.82	42.86	92.37	490.78	183.4	438.12	-97.18	648.27	840.28	2916.23
1	609.82	35106	22062.8	28515.7	25821.1	60811.7	234242	-44.03	44.24	121.69	587.95	184.89	439.6	-110.89	717.29	734.37	3267.05
1	630.15	35106	22062.8	27584.3	24708.4	58074	226980	-43.88	41.72	114.86	553.43	176.11	439.17	-107.63	677.14	771.25	3195.23
1	650.47	27294.8	120261	26614.8	23708.2	55703.7	218462	-42.14	41.99	105.35	509.5	183.1	457.63	-103.1	655.7	820.91	2796.82
1	670.79	35106	22062.8	28175.9	25554.3	55735.6	222261	-43.17	44.58	99	533.93	192.11	478.35	-99.07	646.89	895.24	2687.37
1	691.11	35106	22062.8	26700.7	23695.8	50889.6	205838	-43.89	47.93	78.96	441.88	194.56	506.57	-87.45	559.64	924.04	1867.33
1	711.44	21366.5	210176	25301.3	19138.6	47451.4	177005	-196.09	151.1	141.64	359.69	597.99	917.89	-227.91	512.29	1051.62	1051.74
1	731.76	18394	393550	22012	16874.4	42303.5	147749	-459.93	178.17	303.06	583.12	747.34	1030.22	-734.65	1220.69	1050.8	541.1
1	752.08	-44764.2	193663	19892.5	17761.6	39312.9	124669	-553.81	163.59	436.59	844.76	835.73	741.52	-974.06	2216.49	863.07	201.87
1	772.4	35106	22062.8	19581.6	16191.8	31981	100621	-710.82	171.6	621.52	950.53	832.67	902.93	-1354.61	2230.2	743.48	86.85
1	792.72	82581.7	177016	19190.9	12452.3	29264.5	70265.8	-944.6	170.58	913.59	1444.72	968.44	810.34	-2043.86	4014.5	562.87	83.17
1	813.05	61420.4	114750	20008.3	10645.1	26797.9	42589.3	-1419.2	193.37	1452.17	2264.59	1405.29	882.65	-3278.23	6089.47	508.75	223.02
1	833.37	28891.9	133637	17141.3	6646.35	26957.8	41064.2	-1628.06	289.47	1677.17	2542.11	2097.63	1109.02	-3659.96	6930.37	746.01	256.56
1	853.69	35106	22062.8	16288.6	4758.91	23630.6	45680.6	-1955.64	247.83	2036.46	3080.07	1763.67	954.76	-4405.77	8285.89	563.19	298.51
1	874.01	35106	22062.8	13517.1	3368.18	19985.5	48398.3	-1758.86	245.4	2488.99	2833.85	1746.22	1017.45	-4055.32	7603.66	562.64	291.06
1	894.34	-2131.52	189496	13655.5	3134.77	21532.2	45792.2	-1846.19	243.36	3099.8	2997.51	1731.34	1062.04	-4199.83	7984.35	540.51	294.74
1	914.66	35106	22062.8	10782.8	1979.99	17732.9	49385.1	-1820.62	218.86	3278.57	2956.47	1572.92	969.59	-4173.01	7918.03	442.69	301.92
1	934.98	81077.8	143641	6244.19	3211.4	16906.1	52702.3	-1791.73	275.08	3343.39	2860.23	1797.05	986.23	-3999.88	7689.3	549.58	299.96
1	955.3	35106	22062.8	5287.72	3960.14	17110.4	63075.3	-1761.15	304.96	3727.81	2829.68	2236.2	1209.9	-3968.23	7469.8	708.42	302.39
1	975.62	35106	22062.8	4417.97	3648.63	9529.7	64256	-1896.44	221.95	4303.75	3107.52	1679.37	947.3	-4390.97	8352.55	422.9	370.38
1	995.94	31393.3	91079.9	3766.67	3839.07	12155.7	64758.2	-1894.98	227.12	3608.12	3100.09	1625.25	941.18	-4349.26	8318.44	431.15	361.49
1	1016.27	9963.55	277466	3008.18	4140.22	10477.4	62561.3	-1878.16	221.69	3162.94	3002.12	1619.94	936.15	-4280.71	8149.86	401.27	354.36
1	1036.59	75920.1	152265	2472.04	4174.88	12191.6	62741.7	-1858.24	217.51	2779.23	2962.93	1588.75	930.28	-4217.09	8005.26	408.36	349.82
1	1056.91	48066.9	168220	2605.08	5407.44	16609.4	62623.5	-1802.43	337.82	2431.58	2720.99	2280.64	1022.01	-3893.35	7328.89	726.09	333.21
1	1077.23	64564.1	126129	2093.97	4368.99	11650	64704.5	-1807.26	242.47	2283.36	2800.34	1762.99	1049.44	-4051.86	7557.9	429.89	342.89
1	1097.55	16734.7	172273	1990.04	4134.3	10627.6	62759.4	-1836.03	225.77	2228.76	2859.32	1593.97	935.34	-4135.29	7889	378.08	346.55
1	1117.88	39790.5	130606	1934.99	4057.35	10544	61651.1	-1832.47	220.57	2116.57	2856.42	1546.23	889.58	-4106.13	7829.41	374.83	341.98
1	1138.2	33689.6	50652.7	1923.66	4018.69	9406.1	61098.1	-1825.44	207.42	2053.6	2826.77	1512.08	870.9	-4073.9	7796.02	365.8	346.34
1	1158.52	40197.8	160605	1898.82	3992.08	10497.2	60928.4	-1816.41	213.61	2025.6	2800.57	1489.94	872.12	-4036.12	7692.47	372.52	352.32
1	1178.84	53850.6	217819	1894.89	3980.22	9789.81	60625.9	-1818.3	208.52	1987.33	2769.08	1479.86	925.41	-4014.44	7537.82	368.1	339.21
1	1199.16	38600.8	206287	1924.12	3952.39	9671.04	59187.9	-1821.58	210.32	1963.2	2747.13	1459.07	874.01	-3975.75	7575.49	372.2	347.22
1	1219.49	30209.7	274260	1974.95	3930.76	8087.55	59608.6	-1807.04	209.55	1929.74	2727.37	1443.37	867.36	-3956.52	7600.19	350.35	320.9
1	1239.81	31851.5	263377	2460.95	3841.92	9912.45	59118.8	-1811.93	220.45	1882.21	2721.75	1422.84	882.42	-3941.72	7515.92	363.92	325.89
1	1260.13	15342	234221	3753.45	3336.69	8835.66	58102	-1805.35	211.37	1895.61	2719.31	1421.74	877.71	-3907.36	7508.49	352.19	293.86
1	1280.45	35106	22062.8	4727.58	4290.5	15021.2	60987.2	-1876.45	334.91	1988.96	2726.75	2083.15	1220.18	-3908.49	7482.17	738.5	305.79
1	1300.77	32662.7	196904	5524.23	2879.03	10468.7	59295.3	-1826.84	232.46	1933.13	2756.83	1565.79	1021.88	-3955.77	7528.15	424.4	296.39
1	1321.09	35106	22062.8	5619.07	2668.44	10051.7	58333.2	-1836.03	212.68	1907.22	2754.74	1465.41	888.2	-4006.47	7579.57	350.66	295.61
1	1341.42	42123.2	149012	5111.03	2821.88	9125.37	59039.4	-1843.47	216.01	1848.21	2751.26	1443.78	874.92	-3970.03	7640.9	355.02	307.02
1	1361.74	72116.3	218773	4710.05	2998.98	8331.81	56867.3	-1843.55	206.92	1844.89	2760.98	1444.81	851.92	-3999.84	7563.17	355.81	308.85
1	1382.06	40389.7	53397.7	4430.97	3141.32	9367.08	57495.3	-1842.87	213.24	1852.98	2756.16	1430.11	857	-3972.64	7544.08	345.2	301.09
1	1402.38	19334.1	214514	4069.1	3307.08	8286.15	58466.6	-1850.62	215.06	1856.8	2750.81	1406.96	858.97	-3966.01	7509.03	371.52	314.68
1	1422.7	63147.2	163615	3885.83	3329.84	8703.51	57131.1	-1850.27	209.53	1823.42	2728.92	1404.77	845.31	-3959.4	7583.72	351.91	308.31
1	1443.02	52202	280453	3623.87	3468.06	9557	56957.2	-1862.74	213.76	1810.98	2722.64	1382.23	843.07	-3966.56	7469.66	344.81	323.61
1	1463.35	35271.8	206111	3566.96	3498.33	9538.59	54910.5	-1858.48	217.87	1799.51	2736.21	1373.98	840.8	-3947.72	7584.97	339.93	316.69
1	1483.67	49908	240756	3657.11	3418.31	9766.51	55491	-1854.09	210.14	1808.04	2749.68	1354.35	844.24	-3944.1	7426.21	358.7	308.61
1	1503.99	11467.2	277874	3599.88	3446.42	8482.36	55614.1	-1859.51	206.58	1815.67	2730.46	1350.88	831.85	-3936.24	7515.46	350.19	309.22
1	1524.31	41013.7	130976	3379.3	3496.35	9316.69	54843.1	-1872.84	202.24	1800.23	2726.82	1340.47	821.04	-3939.31	7527.94	339.01	308.87
1	1544.64	33648.5	58511.3	3220.59	3466.9	7423.62	55991.2	-1876.21	210.34	1799.85	2714.37	1323.94	813.38	-3930.9	7450.31	348.4	299.01
1	1564.96	34567	270555	3144.19	3562.63	9465.95	55258.3	-1878.28	209.17	1816.32	2712.52	1314.65	809.45	-3912.53	7439.28	335.31	298.01
1	1585.28	12302.2	214819	3030.95	3545.69	9525.94	54622.9	-1871.54	209.87	1796.42	2706.23	1310	793.15	-3924.92	7453.92	339.76	302.38
1	1605.6	62125.5	176991	2989.34	3543.81	8977.16	54520.1	-1878.39	212.59	1781.6	2713.52	1299.99	784.75	-3904.37	7429.75	300.14	294.87
1	1625.92	54367.5	237125	2991.84	3519.15	9596.84	52164	-1883.98	210.11	1791.04	2712.24	1289.53	769.04	-3916.94	7427.22	323.05	305.86
1	1646.25	40567.8	131653	2968.2	3521.94	8657.05	53054.2	-1882.78	203.82	1786.32	2697.94	1285.05	751.12	-3917.09	7392.96	303.21	309.47
1	1666.57	35106	22062.8	2965.24	3541.58	8886.44	53780.8	-1882.35	198.57	1793.71	2700.25	1277.14	743.15	-3898	7499.94	291.13	296.24
1	1686.89	40120.1	169444	2899.18	3511.24	8145	54228.1	-1880.77	196.31	1767.79	2696.52	1257.86	753.43	-3879.99	7466.47	318.16	304.21
1	1707.22	35106	22062.8	2938.86	3525.31	8052.33	53602.7	-1896.66	197.18	1768.25	2719.84	1257.74	720.17	-3895.11	7337.64	308.34	302.35
1	1727.54	35106	22062.8	2897.79	3498.46	7570.13	52238.8	-1889.6	195.98	1782.02	2687.58	1250.77	707.09	-3891.81	7407.57	305.6	318.2
1	1747.86	35106	22062.8	2830	3457.31	8089.13	54813.7	-1890.69	200.28	1800.96	2694.69	1244.65	690.09	-3884.76	7445.15	290.98	299.96
1	1768.18	56485.6	204088	2898.47	3413.28	8549.49	52786.2	-1888.13	196.44	1790.59	2676.38	1245.63	680.2	-3896.34	7453.54	278.68	313.52
1	1788.5	49912.7	99836.1	3369.99	3235.49	11617.4	50220.4	-1896.21	191.79	1762.01	2690.69	1229.96	672.6	-3885.32	7351.52	293.28	307.17
1	1808.83	19043.7	217425	3483.83	3196.44	11462.5	48584.8	-1899.68	193.96	1782.86	2674.68	1225.06	661	-3891.84	7333.75	272.63	300.53
1	1829.15	66542.5	206437	3373.24	3231.66	10569.2	48908.9	-1896.73	190.42	1755.69	2693.51	1219.95	652.68	-3886.71	7373.74	285.42	311.96
1	1849.47	8301.66	32713.6	3217.77	3275.22	11402.5	49819.3	-1906.73	200.43	1776.26	2683.02	1226.68	632.42	-3883.22	7558.64	281.89	312.63
1	1869.79	14232.3	24883	3034.37	3344.39	10036.1	50425.2	-1893.75	189.9	1756.4	2697.14	1209.91	635	-3876.37	7405.65	259.22	305.41
1	1890.12	12755.4	18308.4	2903.98	3354.38	9540.93	51693.5	-1900.08	192.66	1757.74	2686.41	1206.72	625.74	-3871.55	7355.38	262.09	299.44
1	1910.44	12185.5	17508.4	2879.2	3362.22	9856.15	52136.7	-1897.39	194.11	1790.77	2659.89	1208.44	618.29	-3877.61	7399.06	264.71	311.12
1	1930.76	13480.8	17030.1	2832.2	3366.9	7223.08	52144.9	-1891.65	192.3	1746.76	2685.88	1191.77	620.27	-3880.85	7367.62	281.81	315.87
1	1951.08	12277.1	15429.5	2789.6	3380.51	8322	53136.2	-1910.17	191.8	1756.21	2672.15	1182.66	618.29	-3882.7	7451.26	264.64	311.47
1	1971.41	11704.8	13510.7	2795.47	3355.83	8985.84	52658.3	-1899.75	185.83	1733.8	2678.09	1184.34	599.76	-3874.89	7308.17	254.19	319.2
1	1991.73	12599.6	17118.4	2780.01	3327.96	8759.15	52530	-1904.11	185.1	1778.53	2663.36	1183.48	584.71	-3872.04	7277.1	256.51	304.99
1	2012.05	11928.2	14793.8	2811.81	3315.46	8679.44	53051.6	-1904.14	186.33	1762.11	2670.4	1172.73	586.39	-3851.53	7368.73	239.28	305.5
1	2032.37	12564.3	17070	2761.64	3315.88	9027.63	53167.2	-1912.8	191.05	1740.73	2668.46	1170.45	577.29	-3854.35	7318.82	241.52	312.87
1	2052.69	12811.6	15987.6	2862.88	3283.12	7785.06	52223.4	-1910.53	182.56	1738.89	2668.11	1171.77	566.58	-3868.42	7316.94	252.54	319.44
1	2073.02	12661.5	13318.1	2833.72	3326.54	8802.41	50377.7	-1904.73	182.45	1740.73	2669.66	1166.72	551.91	-3862.42	7297.82	235.85	312.98
1	2093.34	12281.9	11549.4	2835.8	3234.66	8634.02	51971.7	-1910.48	179.83	1744.97	2664.93	1162.21	539.79	-3860.74	7223.29	236.44	325.2
1	2113.66	14256.5	27038.9	2794.1	3243.65	7873.85	51272.3	-1903.72	175.29	1778.66	2668.67	1151.55	525.99	-3834.99	7298.35	235.28	312.95
1	2133.99	11493.8	11803.9	2806.43	3191.41	8052.46	51469.6	-1905.66	182.63	1773.31	2645.48	1143.5	523.28	-3836.21	7414.74	228.77	325.19
1	2154.31	12450.9	17289	2873.05	3196.72	7376.82	51127.4	-1901.11	175.37	1742.56	2655.08	1133.32	520.61	-3847.34	7285.13	236.27	317.55
1	2174.63	12433.6	9162.94	2917.31	3190.06	8649.96	51484.1	-1908.03	181.16	1742.06	2672.2	1140.48	504.85	-3836.38	7320.82	241.33	310.65
1	2194.95	14845.9	24520.3	2884.9	3167.82	7939.55	51529.4	-1904.42	179.46	1732.79	2657.19	1142.68	492.27	-3837.08	7299.28	209.02	300.65
1	2215.28	12725.1	6664.84	2870.38	3193.88	8805.17	51480.1	-1901.05	173.09	1725.99	2675.57	1127.97	492.8	-3850.18	7339.38	225.71	321.93
1	2235.6	14593.4	20782.4	2949.64	3130.15	8443.29	49847.3	-1904.83	186.85	1685.52	2651.63	1131.8	477.35	-3818.55	7425.64	220.16	311.47
1	2255.92	14646.7	14217.3	2988.96	3147.76	8381.2	49247.9	-1915.03	183.79	1713.13	2648.28	1124.85	473.81	-3830.61	7344.3	212.99	312.57
1	2276.25	14477.2	20251.5	2940.84	3113.48	8688.69	50446.2	-1917.92	170.7	1729.29	2644.74	1120.61	463.35	-3824.6	7353.7	213.22	307.5
1	2296.57	16428.7	12972.6	2942.36	3084.16	8297.77	50076.1	-1907.18	173.71	1769.12	2646.42	1115.8	448.54	-3838.57	7316.28	218.19	308.46
1	2316.89	13380.5	20249.6	2906.41	3109.2	9075.01	49415.1	-1912.96	171.12	1735.96	2648.67	1110.4	440.95	-3815.71	7327.74	214.73	317.83
1	2337.21	15012.5	22172	2967.72	3087.89	8433.45	49467.8	-1914.44	176.72	1730.77	2642.87	1108.81	433.83	-3817.79	7251.59	197.53	315.44
1	2357.54	15176	12850.7	2931.67	3075.39	7045.35	49527.5	-1906.3	177.92	1724.06	2657.15	1107.24	422.9	-3836.56	7349.05	200.12	310.62
1	2377.86	13003.4	7293.55	2931.59	3060.81	7308.49	48517.3	-1914.64	174.45	1705.19	2663.53	1104.24	417.7	-3836.34	7357.2	201.21	304.27
1	2398.18	14556.1	20829.1	2908.29	3046.93	8214.33	49398.1	-1914.93	174.97	1748.3	2640.75	1099.4	406.79	-3819.79	7281.28	199.69	312.74
1	2418.51	13123.1	14259.4	2926.4	3054.66	7745.55	48471.5	-1921.12	174.92	1718.49	2643.4	1094.9	402.19	-3829.18	7294.61	175.66	304.6
1	2438.83	18083.6	26667.3	2887.4	3037.09	8056.73	49431.5	-1919.64	167.39	1722.78	2629.26	1094.47	386.26	-3815.77	7366.85	202.71	317.14
1	2459.15	15140.6	17553.9	2894.8	3030.29	7910.82	48027.8	-1912.68	169.96	1700.95	2645.36	1090.57	386.58	-3815.72	7340.55	181.74	312.83
1	2479.48	21444.6	38547.3	2886.51	3011.74	7435.29	49523.9	-1919.5	167.64	1723.1	2648.04	1088.7	371.51	-3818.39	7277.99	196.02	312.27
1	2499.8	13240.7	15754	2882.57	3028.36	9101.95	48096.1	-1917.79	169	1739.49	2632.25	1082.5	356.52	-3818.98	7179.96	195.6	312.02
1	2520.12	17617.8	26106.8	2868.91	3006.16	8088.41	49827.1	-1915.27	161.91	1686.19	2644.21	1087.69	345.29	-3821.13	7170.83	178.25	326.48
1	2540.45	14543.3	6827.12	2841	3022.92	7164.03	48581.7	-1921.78	158.99	1694.73	2633.85	1087.46	338.23	-3822.51	7143.61	168.95	324.05
1	2560.77	19931.8	46627.1	2795.46	3000.8	8016.55	48425.6	-1918.84	160.81	1735.23	2630.45	1071.79	339.52	-3797.36	7371.69	167.73	308.95
1	2581.1	14341.7	21900.1	2831.03	2995.3	7355.25	48351.9	-1916.2	164.67	1706.62	2644.42	1072.99	324.89	-3811.04	7255.94	170.11	316.01
1	2601.42	14933.6	24883	2786.14	3012.22	7629.52	47968	-1921.2	169.81	1738.2	2639	1071.14	315.61	-3799.85	7333.4	165.66	320.44
1	2621.75	13208.6	21950.1	2780.62	3031.1	7379.64	48919	-1922.44	158.83	1685.83	2639.29	1075.98	297.55	-3816.6	7234.94	161.89	313.88
1	2642.07	16175	10623.6	2754.28	2994.5	7213.07	48779.4	-1918.32	161.2	1716.01	2647.17	1068.05	296.63	-3796.86	7273.24	152.59	308.72
1	2662.39	18881.7	34868.9	2775.49	2996.54	8419.79	49232.8	-1918.27	160.43	1727.45	2641.03	1061.01	292.62	-3793.11	7248.36	158.23	318.55
1	2682.72	16076.6	11111.8	2760.12	2987.22	8044.64	47606.8	-1924.98	160.74	1697.69	2633.85	1058.91	284.14	-3820.82	7324.88	148.46	305.59
1	2703.04	14796.9	27905.6	2740.73	2984.51	8524.13	49531.9	-1923.98	158.9	1699.35	2623.87	1059.66	274.61	-3791.95	7186.96	149.34	312.29
1	2723.36	20355.1	17526.8	2732.06	2964.7	7217.87	47415.1	-1923.25	154.86	1715.6	2613.3	1062.74	263.88	-3803.75	7180.33	156.5	315.18
1	2743.69	14599.4	45256.7	2718.54	2954.4	7414.96	49587.8	-1906.55	157.47	1709.73	2609.77	1057.85	259.55	-3806.8	7298.63	157.15	314.48
1	2764.01	17648.2	10444.1	2695.04	2951.31	6715.95	48883.5	-1928.37	159.41	1694.65	2632.03	1055.29	252.78	-3789.76	7276.42	165.06	323.96
1	2784.34	16841.5	15488.4	2705.45	2969.9	7723.82	49221	-1922.76	156.91	1682.73	2637.54	1055.11	242	-3788.47	7213.83	152.45	317.93
1	2804.66	20556.1	37631.1	2681.29	2942.16	7223.5	47625.2	-1922.56	160.45	1678.64	2633.46	1042.55	248.53	-3806.03	7213.57	139.49	319.79
1	2824.99	20053.8	11747.1	2691.13	2978.61	6131.27	49167.5	-1918.29	158.09	1721.42	2624.52	1051.28	232.48	-3800.48	7208.65	153.93	302.61
1	2845.31	21841.6	49114.5	2640.34	2933.31	7029.08	49132.3	-1921.96	154.78	1709.12	2635.9	1043.6	229.24	-3811.82	7264.9	135.29	320.61
1	2865.63	16155.5	23041.9	2670.97	2966.52	6468.29	48032.8	-1920.62	156.83	1700.24	2624.88	1038.75	226.97	-3797.48	7199.51	135.2	312.34
1	2885.96	16977	68164.2	2650.56	2948.8	6838.31	48659.4	-1925.8	152.74	1673.28	2618.33	1045.46	214.37	-3785.42	7252.84	127.89	313.71
1	2906.28	16070.1	24664.7	2655.46	2940.85	8595.13	49354.6	-1922.33	155.4	1700.64	2626.32	1037.87	215.17	-3790.48	7158.58	128.34	307.02
1	2926.61	13432.5	20080	2661.62	2942.8	7068.4	48079.2	-1915.88	155.6	1712.98	2606.37	1038.71	205.91	-3781.78	7145.91	136.48	318.69
1	2946.93	20711.8	54532.4	2637.01	2953.17	6128.67	47834.4	-1918	153.74	1699.55	2612.48	1039.05	205.35	-3788.53	7199.13	138.92	312.88
1	2967.25	15566.9	22773.2	2628.66	2937.61	7660.45	47702.4	-1913.51	160.15	1703.99	2623.48	1033.19	208.84	-3774.22	7298.6	128.36	311.48
1	2987.58	22962.9	27780.4	2649.17	2956.01	7823.93	48740.4	-1922.83	154.51	1711.13	2601.71	1033.22	199.92	-3779.58	7152.44	132.47	324.61
1	3007.9	13964.5	20244.6	2612.21	2937.39	5821.93	47606.5	-1917.27	157.54	1660.29	2617.42	1034.65	193.86	-3783.61	7118.4	137.22	324.48
1	3028.22	14139.4	26089.5	2616.44	2933.95	7553.48	48108.6	-1916.4	160.04	1678.1	2602.3	1031.35	194.9	-3776.88	7211.77	143.42	315.99
1	3048.55	18892.6	42874.8	2593.61	2943.69	6079.9	47986.1	-1928.09	144.17	1710.49	2608.71	1029.3	192.06	-3776.95	7283.25	131.38	308.56
1	3068.87	14902.6	29311.5	2575.11	2939.04	6700.78	48303.1	-1927.21	147.21	1692.37	2607.62	1029.88	189.5	-3772.17	7099.41	119.66	321.26
1	3089.2	16851.3	47595.7	2567.51	2929.97	7393.24	48624.5	-1915.21	155.66	1673.84	2609.95	1025.39	187.02	-3778.65	7186.15	126.75	310.06
1	3109.52	21451.3	56664.5	2535.12	2926.78	7816.5	48778.2	-1918.87	152.12	1678.63	2612.53	1023.8	184.91	-3765.85	7233.12	114.54	306.09
1	3129.84	20604.6	37252.9	2542.97	2937.01	8035.75	47924.6	-1916.02	152.56	1706.41	2603.32	1024.29	183.9	-3752.32	7236.35	120	316.6
1	3150.17	36115	343250	2549.46	2945.89	6125.45	48784.8	-1930.99	148.34	1700.77	2594.74	1021.61	182.37	-3761.12	7199.87	131.82	316.21
1	3170.49	16496.6	28062.4	2574.37	2938.38	6378.51	48980.5	-1921.21	154.33	1702.26	2590.81	1017.67	181.22	-3759.26	7166.7	123.12	309.11
1	3190.82	20302.1	20575.8	2524.52	2904.05	6132.76	47740.6	-1919.59	148.95	1683.93	2586.58	1016.18	178.18	-3761.54	7159.03	123.37	320.32
1	3211.14	14215.6	39069.3	2531.03	2916.51	7063	48164.4	-1922.49	153.54	1695.12	2606.37	1015.68	174.67	-3751.81	7211.91	140.04	322.75
1	3231.47	14239.3	25745.9	2548.88	2944.2	6305.96	47593.6	-1921.51	151.58	1692.11	2604.58	1017	170.36	-3750.19	7194.77	116.05	318.97
1	3251.79	15544	31179.5	2550.97	2938.73	7252.14	47248.4	-1920.18	149.64	1688.77	2602.68	1017.81	165.38	-3764.71	7266.45	127.93	325.3
1	3272.11	17615	25777.8	2505.75	2932.35	5309.92	48386.8	-1923.85	153.29	1671.81	2607.95	1017.42	162.24	-3772.05	7190.93	125.84	316.1
1	3292.44	16146.1	17934.3	2508.88	2944.99	6712.52	47547	-1926.05	153.36	1706.92	2606.41	1013.07	161.68	-3764.65	7182.55	120.99	313.24
1	3312.76	10854.6	23179.7	2488.28	2933.57	6863.75	47440.3	-1931.6	149.28	1723.25	2601.64	1015.48	156.12	-3749.83	7164.47	127.53	317.9
1	3333.09	25530.1	41991.6	2501.28	2961.8	6956.02	47119.2	-1924.69	148	1676.86	2595.31	1012.99	150.45	-3758.12	7137.95	123.6	304.13
1	3353.41	11345.9	171719	2487.44	2941.76	6665.28	47693.4	-1929.44	146.32	1702.27	2600.07	1008.79	155.04	-3767.45	7109.67	125.31	325.27
1	3373.74	11761.8	55117.2	2499.19	2965.16	6846.37	48826.9	-1929.61	150.36	1697.69	2597.08	1006.49	149.47	-3758.81	7163.71	118.17	325.05
1	3394.06	22911.2	42169.5	2452.99	2921.34	6821.49	47875.1	-1930.02	149.27	1679.74	2602.49	1013.67	139.01	-3756.16	7154	128.78	329.59
1	3414.39	18941.4	29066.8	2475.33	2939.91	7300.37	48288.4	-1925.3	146.09	1673.9	2607.43	1005.51	141.2	-3764.93	7150.25	114.87	307.36
1	3434.71	36236.9	172221	2465.36	2954.24	6615.8	47481	-1937.87	153.42	1730.61	2591.36	1002.55	141.1	-3765.53	7120.43	114.01	319.21
1	3455.04	17695	54401	2443.79	2931.61	6695.47	47749.7	-1931.8	151.59	1673.16	2598.8	1000.35	134.72	-3764.23	7119.74	121.92	317.45
1	3475.36	17746.2	40366.8	2440.55	2941.9	6806.04	47737.6	-1931.95	148.71	1705.08	2604.29	1007.1	126.98	-3756.52	7187.41	128.09	326.9
1	3495.69	18595.6	18069.9	2419.97	2924.42	6786.19	47780.3	-1921.65	148.88	1694.13	2596.7	1003.16	125.6	-3753.07	7115.26	120.15	321.1
1	3516.02	9881.17	46832.8	2414.56	2921.48	5206.72	48115.2	-1927.52	153.63	1704.57	2588.03	995.73	129.93	-3769.87	7094.53	105.14	320.59
1	3536.34	18360.6	24898.1	2409.34	2899.15	6880.97	48473.4	-1931.41	148.71	1673.42	2595.08	999.98	125.71	-3752.46	7159.96	119.59	317.2
1	3556.66	14509.6	33781.2	2426.55	2921	7545.73	47637.5	-1925.62	148.75	1698.4	2616.89	996.17	125.99	-3758.57	7111.04	104.64	322.71
1	3576.99	17379.3	11195.2	2391.01	2906.85	7104.48	47338.8	-1934.57	149.22	1689.65	2604.54	1002.41	118.01	-3747.21	7116.4	107.66	310.03
1	3597.31	22325.3	22669.5	2395.58	2942.42	6680.4	47259.5	-1938.54	149.16	1650.45	2595.36	998.84	115.91	-3748.42	7204.11	109.97	322.36
[truncated: 30 more columns]
