# Supplementary material for: Comparative Room Burn Study of Furnished Rooms from the United Kingdom, France and the United States
Source: Springer Nature journal article supplement (doi:10.1007/s10694-019-00888-8), 2019-07-16
Supplement: MOESM8 [file 16938730]

## Sheet: 18-313ACC-FR2Door
Version=1
NumMeasures=000177
NumComponents=8
Usage=0
SystemID=
Title=Linked spectrum at 0.341 min.
Description=
NumMethods=1
MethodNumComponents1=8
MethodTitle1=PRis	All gases except NO 2016
NumLimits=0008
UseLimit=0	0	0	0	0	0	0	0
LowerLimit=0.000	0	0	0	0	0	0	0
UpperLimit=0.000	0	0	0	0	0	0	0
StartTime=06Feb36002816
EndTime=06Feb36012812
DataTable
Sequence	Time	CO2	(+)CO2	CO	(+)CO	HCl	(+)HCl	HF	(+)HF	SO2	(+)SO2	NO2	(+)NO2	HBr	(+)HBr	HCN	(+)HCN
		ppm	(+)ppm		ppm	(+)ppm	ppm	(+)ppm		ppm	(+)ppm	ppm	(+)ppm	ppm	(+)ppm		ppm	(+)ppm	ppm	(+)ppm	ppm	(+)ppm	ppm	(+)ppm		ppm	(+)ppm	ppm	(+)ppm	ppm	(+)ppm	ppm	(+)ppm	ppm	(+)ppm		ppm	(+)ppm	ppm	(+)ppm	ppm	(+)ppm	ppm	(+)ppm	ppm	(+)ppm	ppm	(+)ppm
1	20.46	625.91	631.21	628.33	788.7	567.05	1861.63	-152.08	32.02	-173.42	174.52	130.95	91.03	-849.74	3354.47	25.41	41.15
1	40.78	118.43	159.78	-1.6	46.68	-8.82	368.83	9.53	7.32	-23.27	21.44	-4.26	75.38	-3.51	110.42	7.94	6.66
1	61.1	119.23	166.1	-4.63	51.1	1130.82	1697.63	11.53	10.54	-34.99	20.03	-9.34	72.32	-10.91	111.69	-16.62	5.89
1	81.42	118.63	157.12	-3.9	51.42	56.57	542.74	8.08	6.54	-10.99	33.78	-9.44	73.03	5.45	120.45	-14.87	4.93
1	101.74	128.79	170.98	-19.64	82.58	-530.65	864.81	12.61	5.75	-19.18	33.29	-12.62	72.33	-1.85	230.3	-16.82	5.27
1	122.06	134.61	157.57	-4.13	55.15	826.41	507.29	15.01	4.14	-7.24	29.69	-7.54	77.33	9.52	116.34	-2.63	2.43
1	142.38	117.61	166.16	21.26	35.63	165.88	619.11	13.84	4.38	-56.8	22.15	-9.98	74.73	-4.2	203.52	-13.67	6.18
1	162.7	141.59	177.01	-0.28	56.56	736.51	1681.84	15.14	4.82	-20.27	36.09	-6.75	77.21	-5.21	132.77	-3.38	1.15
1	183.02	363.95	624.66	8.94	47.55	447.49	527.06	8.95	9.84	12.83	33.15	-9.78	71.11	-11.85	130.15	-2.05	3.96
1	203.34	532.86	996.58	-4.19	62.83	-246.44	617.01	14.78	5.79	-47.21	26.58	-14.53	63.16	-0.8	117.77	-14.41	4.82
1	223.66	1314.51	1141.56	-7.72	64.06	67.76	1959.99	13.36	12.68	-31.54	17.31	-9.89	66.47	2.51	96.65	3.32	4.48
1	243.98	3091.4	1343.9	23.8	31.15	1310.03	1828.73	16.36	6.15	-38.3	25.79	-11.83	50.62	-3.32	146.97	-12.68	9.59
1	264.3	5999.07	5855.16	25.01	29.62	911.28	1059.02	12.9	8.99	-23.42	24.15	-9.09	41.1	2.27	126.89	3.19	3.05
1	284.62	11702	18264.5	36.4	31.11	250.7	1536.69	19.2	7.24	-33.71	34.17	-12.05	20.19	7.96	158.32	7.14	9.94
1	304.94	27247.8	162588	292.74	105.78	550.27	307.1	14.9	8.97	-27.95	22.62	-14.95	19.08	-6.43	130.17	4.61	12.66
1	325.26	52242.1	198323	409.53	152.22	1269.13	1417.7	13.2	7.49	-44.53	40.53	-13.17	39.31	0.19	272.68	15.71	12.91
1	345.58	29786.3	292348	377.57	117.66	1553.17	1261.13	13.51	10.81	3.49	18.79	-15.18	51.03	-20.97	223.55	15.27	22.7
1	365.9	57954.8	316597	636.51	113.16	930.06	634.48	10.14	6.2	-39.62	39.58	-13.98	68.6	-11.2	128.81	29.25	19.94
1	386.22	25678.4	194757	809.54	106.95	-187.23	679.86	3.45	12.09	-6.62	26.04	-7.23	83.72	-22.88	121.44	52.2	20.65
1	406.54	35106	22062.8	1259.01	182.4	1977.06	1503.21	6.79	17.85	-3.36	29.2	-6.09	125.19	-27.71	116.96	59.96	28.95
1	426.86	35106	22062.8	6563.91	3459.82	17924.8	34796.8	-8.21	24.45	79.77	115.47	22.31	227.24	-50.14	167.38	157.37	278.1
1	447.18	35106	22062.8	18802.7	14500.7	49005.5	146057	-26.62	49.91	191.83	302.71	66.25	440.67	-87.84	622.19	908.91	1575.05
1	467.5	35106	22062.8	29200.4	27140.2	81418.5	241402	-47.65	73.04	180.28	686.82	139.57	573.02	-128.33	1237.02	1317.68	4096.82
1	487.82	35106	22062.8	32025.3	30315.2	89432.3	265929	-81.48	90.79	165.99	832.54	224.7	640.86	-268.09	1458.64	1278.81	4679.52
1	508.14	30183.2	80234.2	31658.1	29412.2	90800.8	269140	-112.61	100.11	213.96	847.74	282.3	737.79	-347.54	1526.37	1456.55	4405.79
1	528.46	35106	22062.8	25117.8	20594.2	72711.2	214106	-275.04	140.41	341.87	683.34	490.81	976.56	-710.48	1511.29	1462.15	3028
1	548.78	17683.6	308955	25105.1	19553.1	66178.8	189275	-560.63	176.58	683.43	1059.76	729.94	1082.26	-1487.21	2680.44	1511.38	2020.31
1	569.1	40389.4	112964	24559.3	17098.6	69165.3	157726	-738.8	204.92	891.29	1395.59	897.38	1204.45	-2084.71	3601.25	1325.29	1498.63
1	589.42	36502.7	44689.2	25306.5	16219.4	74527.4	164668	-936.74	217.51	1145.72	1825.44	1154.41	1040.94	-2743.65	4853.26	1299.5	1076.24
1	609.74	52176.8	302346	27914.8	19215.1	90052.1	188373	-1117.2	233.04	1472.96	2252.26	1474.83	1144.32	-3409.39	6105.72	1757.21	2044.1
1	630.06	54725.6	87608	27759.5	18365.8	90871.1	164783	-1059.76	207.61	1339.12	2110.04	1398.54	1010.68	-3234.65	5861.51	1121.37	851.31
1	650.38	34030.2	323960	29209.5	19060.4	94770.6	183913	-1022.74	204.26	1272.62	2103.66	1337.78	1046.47	-3163.81	5525.68	995.65	241.42
1	670.7	15878.9	315620	33164.3	21618.4	85468.4	174794	-1346.76	259.2	1815.8	2645.02	1736.28	1164.87	-4016.02	7139.24	1247.06	140.32
1	691.02	43517.1	353198	31025.3	21307	85757.2	145231	-1276.93	218.74	1501.32	2479.81	1554.91	1028.43	-3752.78	6984.29	782.05	223.65
1	711.34	-12728.3	230462	33948.2	23822.8	96061	183678	-1192.67	257.86	1499.66	2419.35	1679.35	1082.27	-3727.85	6679.17	843.04	488.84
1	731.66	79449.6	103255	32648.9	21234.4	68772.5	136343	-1369.65	282.27	1745.85	2688.83	1824.97	1253.5	-4168.57	7310.1	793.36	334.9
1	751.98	35106	22062.8	29507	17437.5	88507.1	128668	-1332.66	255.55	1634.71	2622.78	1691.52	1191.52	-4084.32	7401.79	766.22	371.99
1	772.3	36570.2	98656.6	27198.3	15048.9	67483.9	88543.6	-1410.38	268.32	1764.36	2811.85	1727.19	1148.29	-4271.78	7664.16	764.11	476.75
1	792.62	-15273	251243	24604.1	11485.7	57978.8	56067.3	-1409.63	266.51	1833.78	2786.09	1657.75	1195.01	-4236.84	7810.55	628.53	369.86
1	812.94	35106	22062.8	18604.3	5594.14	70598.1	64498.3	-1586.99	312.03	1974.19	3091.43	1810.03	1401.03	-4632.45	8276.23	591.47	459.83
1	833.26	41023	310646	14286.3	3214.37	-7759	57241.7	-1539.19	269.78	1934.37	2915.15	1762.17	1400.05	-4387.8	7787.79	683.87	473.59
1	853.58	7760.75	279965	13128.7	3155.97	35781.7	84342.7	-1363.9	255.14	2222.79	2621.96	1734.25	1305.07	-3974.61	7116.41	480.81	320.68
1	873.9	32633.9	255746	9843.12	2251.31	18661.8	75229	-1466.91	294.19	3800.66	2816.12	1978.42	1361.45	-4271.2	7609.25	432.12	430.2
1	894.22	61317.9	113967	6574	3627.62	40668.3	81794.2	-1496.37	322.78	5286.77	2930.52	1925.88	1348.69	-4298.66	7772.56	880.86	600.33
1	914.54	35106	22062.8	5383.3	3941.21	26654.7	90939.1	-1469.15	281.38	4650.28	2860.99	1880.57	1358.26	-4269.98	7530.63	445.13	409.64
1	934.86	65228.9	274779	5265.84	4133.04	55535.2	70238.2	-1498.79	286.14	3963.35	2886.2	1852.03	1322.63	-4311.58	8090.69	592.28	557.14
1	955.18	35106	22062.8	4726.68	4494.12	43332.6	72885.2	-1482.39	280.22	3155.85	2885.45	1792.74	1295.56	-4276.4	7681.21	616.84	176.29
1	975.5	48363.9	75767.6	3447.11	5201.39	16966.4	104002	-1552.53	308.25	2676.64	2954.39	1987.74	1278.95	-4495.07	8234.73	307.53	182.28
1	995.82	35106	22062.8	2741.1	5139.06	63284	61323.9	-1537.35	274.79	2402.48	2853.94	1871.32	1250.92	-4437.43	8142.18	414.44	699.31
1	1016.14	-3156.5	317131	2517.94	5173.84	28489.3	100943	-1555.31	256.28	2244.99	2898.18	1800.38	1199.61	-4407.82	8048.09	374.33	611.89
1	1036.46	54281.5	108019	2354.58	5020.92	26544	90880.4	-1545.99	247.79	2051.98	2924.08	1795.62	1112.21	-4450.96	7966.56	166.52	446.87
1	1056.78	9138.77	246099	2283.29	4961.55	21752.3	70736.9	-1528.12	253.02	2171.96	2852.48	1756.39	1036.22	-4434.83	8120.22	216.56	226.16
1	1077.1	27038.8	213218	2223.28	4853.98	36332.8	84654.1	-1515.96	225.53	2001.55	2915.52	1697.33	1013.61	-4434.75	7953.51	552.88	390.59
1	1097.42	30739	136355	2222.27	4811.89	30529	72774.7	-1498.55	205.64	2063.36	2864.48	1698.97	917.27	-4373.69	8072.18	306.55	358.84
1	1117.74	72434.1	130298	2174.52	4704.15	61333.8	88596.1	-1495.93	218.55	2135.54	2857.54	1693.9	848.63	-4441.01	8038.27	169.94	372.93
1	1138.06	35106	22062.8	2152.38	4614.07	29360	82623.9	-1515.09	204.07	1882.49	2927.77	1660.75	805.67	-4482.13	7942.51	489.09	515.91
1	1158.38	35106	22062.8	2131.01	4590.68	31955.4	75162	-1492.85	183.19	1809.42	2910.31	1646.79	777.09	-4413.01	8104.26	237.82	718.67
1	1178.7	-23253.8	229331	2174.93	4613.26	-10919.6	94910.2	-1521.63	209.37	1998.47	2873.36	1623.61	785.07	-4409.69	8012.66	311.1	435.92
1	1199.03	34456.2	33299.3	2228.9	4531.77	21661.2	78562.3	-1517.11	199.62	1791.18	2878.16	1631.01	759.7	-4376.26	8023.58	62.75	267.66
1	1219.35	28082.9	158414	2360.5	4577.01	46556.4	82065.3	-1494.04	189.38	1876.89	2908.73	1597.67	714.53	-4472.06	8157.58	277.08	393.97
1	1239.67	60880.7	263811	2722.85	4472.47	9116.96	90266.3	-1475.97	185.3	1951.93	2875.66	1624.3	742.34	-4427.01	7887.29	-75.52	124.13
1	1259.99	14157.5	274347	2540.23	4497.6	15219	93078.6	-1519.05	191.4	1884.66	2826	1631.58	797.32	-4434.84	7922.35	261.08	567.99
1	1280.31	40624.6	172693	4749.6	3718.2	34279.2	64130.2	-1518.94	188.61	1864.94	2856.12	1603.92	757.19	-4358.32	8028.51	57.61	394.16
1	1300.63	39385.2	260349	4748.25	3568.47	28607.4	83068.6	-1520.29	166.56	1828.2	2906.73	1577.62	687.25	-4421.73	8116.5	99.39	423.43
1	1320.95	-9419.41	283128	4737.6	3597.25	22571.4	83542.8	-1515.91	180.24	1792.37	2852.09	1617.47	619.81	-4406.76	7860.26	404.02	361.08
1	1341.27	27634.7	314669	4596.22	3696.69	25650.2	68308	-1510.21	185.05	1712.11	2883.19	1594.52	633.63	-4396.25	8092.78	226.45	482.5
1	1361.6	33774.3	44918	4385.37	3778.52	28563.3	69330.5	-1499.09	192.93	1787.99	2915.3	1581	610.58	-4437.89	7955.79	22.24	292.75
1	1381.92	23891.4	219121	4056.42	3827.17	21351.1	104899	-1501.19	188.69	1825.55	2862.35	1542.15	585.27	-4372.52	7954.08	143.37	202.7
1	1402.24	58623.8	142188	3835.5	3829.27	9774.43	80271.1	-1491.25	175.3	1834.73	2859.36	1540.22	554.42	-4386.89	8006.63	12.69	275.4
1	1422.56	84995.9	192406	3729.15	3848.49	29466.8	87058.1	-1484.8	179.33	1811.7	2852.87	1546.63	513.61	-4394.97	8005.97	67.62	106.94
1	1442.88	35106	22062.8	3787.28	3915.9	21283.2	93288.4	-1472.91	171.47	1749.58	2843.96	1528.97	549.73	-4387.94	8073.91	12.9	176.15
1	1463.2	-12856	250156	3652.52	3917.19	20816	77392.7	-1486.5	173.59	1761.63	2865.08	1520.56	510.76	-4385.84	7784.76	-22.68	457.79
1	1483.52	27707.8	276368	3594.33	3925.7	31170.6	66126.8	-1499.56	166.13	1755.37	2848.22	1517.15	486.17	-4384.78	7968.27	-115.88	293.69
1	1503.84	-20217.9	168160	3540.63	3944.81	10863.7	70897.1	-1493.61	170.9	1943.73	2843.6	1531.03	449.76	-4408.98	7884.36	-99.8	137.98
1	1524.16	64978.4	128777	3390.16	3853.16	50018.2	82265.4	-1512.1	155.49	1695.33	2860.78	1544.63	422.18	-4347.72	7776.94	81.59	395.12
1	1544.48	-11873.8	207774	3370.83	3934.19	39706.8	73965.3	-1476.31	164.93	1714.54	2871.67	1481.97	457.52	-4378.66	8055.12	-47.83	232.27
1	1564.8	23716.1	160016	3292.4	3955.37	33746.8	75324.3	-1499.45	156.31	1768.61	2849.15	1512.11	394.29	-4397.81	8056.37	178.51	396.87
1	1585.12	32543.9	245577	3254.34	3941.73	31669.7	103164	-1517.68	158.09	1850.94	2838.67	1504.81	361.05	-4364.58	7923.75	234.44	350.67
1	1605.44	35106	22062.8	3289.62	3937.28	27133.5	88183.3	-1478.06	149.08	1762.38	2847.13	1520.81	324.54	-4414.41	7762.41	-66.81	455.97
1	1625.76	12165.5	211071	3222.96	3944.76	62661.1	72105.9	-1476.1	137.33	1736.73	2850.92	1508.14	320.17	-4381.03	7719.93	75.45	352.47
1	1646.08	27484.3	287756	3129.09	3897.48	21132.9	69401.6	-1475.46	151.33	1857.37	2863.79	1504.72	306.86	-4394.85	7832.27	24.71	273.56
1	1666.4	29519.6	240038	3110.41	3843.98	27911.9	69117.6	-1479.04	142.37	1737.96	2878.73	1499.12	297.36	-4381.34	7886.54	42.68	207.19
1	1686.72	10802.7	5916.57	2891.98	3943.45	15613	63502.2	-1501.18	136.95	1758.81	2816.06	1503.79	406.47	-4330.34	7857.98	3.98	518.52
1	1707.04	2313.24	2599.95	1781.72	3738.46	49471.9	80618.9	-1453.39	99.25	1667.49	2862.07	1470.71	290.71	-4333.77	7895.04	-174.42	358.37
1	1727.36	2252.16	2661.02	1726.71	3632.35	3708.16	100584	-1481.04	94.53	1708.05	2838.38	1479.69	310.2	-4337.12	7849.12	-234.62	432.42
1	1747.68	2232.46	2663.44	1803.95	3744.88	33895.8	61832.6	-1479.16	91.67	1697.33	2839.31	1484.72	328.21	-4349.16	7849.53	-50.29	431.64
1	1767.99	2265.9	2743.98	1721.21	3571.68	27616.8	86709.7	-1452.45	96.33	1731.04	2840.87	1475.15	312.5	-4431.84	7747.03	-190.52	314.06
1	1788.31	2245.98	2676.89	1779.55	3655.44	15457.9	90717.8	-1452.97	103.59	1695.14	2890.35	1489.81	338.29	-4351.04	8118.96	-61.44	552.71
1	1808.63	2242.76	2661.03	1796.25	3691.59	10840.7	87587.8	-1442.61	111.47	1679.98	2872.76	1466.56	326.06	-4339.69	7741.5	-26.13	551.58
1	1828.95	2236.87	2683.89	1741.42	3620.79	7298.63	77345.7	-1437.61	106.35	1749.99	2815.25	1467.6	333.29	-4375.14	8208.38	-250.04	420.86
1	1849.27	2262.27	2661.6	1683.56	3554.46	10966	91837.5	-1466.44	98.83	1748.32	2839.28	1456.56	326.37	-4356.18	7852.95	-200.12	427.67
1	1869.59	2254.49	2663.1	1716.49	3602.4	13182.3	66551.3	-1458.4	103.41	1655.73	2849.88	1469.02	331.36	-4350.64	7607.8	-46.56	430.23
1	1889.91	2267.91	2711.77	1786.75	3685.74	21133.6	85268.6	-1472.61	102.63	1728.53	2842.76	1480.28	352.4	-4385.68	7977.52	-158.7	359.3
1	1910.23	2249.58	2642.81	1682.8	3568.88	27611.1	84378.3	-1441	108.02	1763.26	2867.15	1466.79	342.9	-4330.04	7727.19	-195.13	274.73
1	1930.55	2263.8	2655.58	1690.55	3526.55	16139.6	73585.7	-1454.96	83.7	1653.72	2833.62	1459.99	330.67	-4373.53	7713.69	-147.68	428.31
1	1950.87	2249.44	2647.52	1735.74	3574.68	4860.32	73287.4	-1459.71	97.16	1755.48	2801.07	1463.87	342.31	-4333.49	7871.17	-5.61	566.67
1	1971.19	2263.34	2684.24	1669.61	3471.94	26313.7	92389.2	-1456.53	99.46	1737.9	2868.3	1453.27	336.65	-4327.74	7771.16	-249.46	528.05
1	1991.51	2262.85	2619.07	1745.94	3604.39	26650.9	88727.9	-1456.77	101.64	1756.14	2819.98	1454.24	343.08	-4367.45	7859.23	-34.75	568.7
1	2011.83	2273.92	2717.45	1700.2	3566.17	20736.5	86677.8	-1462.4	101.17	1703.52	2820.35	1447.11	343.4	-4345.35	7957.61	-32.75	569.41
1	2032.15	2253.15	2629.29	1778.29	3694.65	38629.4	74929.3	-1464.07	94.86	1719.28	2831.72	1440.2	345.79	-4313.96	8189.6	-90.16	449.22
1	2052.47	2287.87	2696.95	1675.86	3532.14	26285	80556.6	-1475.43	97.54	1679.81	2869.01	1449.97	352.58	-4333.46	7833.64	-113.45	542.68
1	2072.79	2256.05	2613.08	1715.19	3596.64	24496.6	80849.7	-1473.03	94.75	1705.48	2848.16	1482.01	356.17	-4305.04	7918.21	-35.46	545.59
1	2093.11	2272.86	2655.92	1719.42	3599.39	31436.5	71928.7	-1452.42	102.56	1667.98	2841.51	1443.59	344.08	-4403.17	7866.05	-195.7	206.49
1	2113.43	2272.1	2671.1	1714.83	3573.38	10732.5	86843.4	-1452.1	107.14	1737.55	2854.85	1437.61	345.45	-4358.8	7886.92	-208.96	441.25
1	2133.76	2291.97	2683.77	1718.07	3556.36	23025.5	91834.2	-1461.19	119.6	1790.4	2841.56	1442.43	350.28	-4350.15	7852.98	78.61	448.14
1	2154.07	2280.81	2621.42	1707.07	3579.77	11040.9	78589.3	-1438.67	99.2	1764.01	2828.14	1456.22	359.95	-4350.69	7917.05	-178.21	455.38
1	2174.39	2291.26	2683.55	1692.36	3597.83	16030	96967.9	-1451.04	105.22	1718.25	2865.14	1432.6	348.67	-4360.37	7968.91	-192.93	457.06
1	2194.71	2277.39	2635.69	1651.79	3505.95	29349.4	83423.6	-1453.28	105.88	1616.37	2857.32	1420.87	339.58	-4326.29	8045.57	-161.28	404.74
1	2215.03	2308.57	2724.01	1690.24	3536.02	48529.4	68953.6	-1448.89	114.03	1651.7	2869.97	1431.2	338.46	-4374.06	7671.25	-39.19	219.67
1	2235.35	2286.55	2624.91	1711.58	3556.89	26406.5	77772.4	-1437.65	104.74	1745.92	2842.51	1396.85	323.04	-4342.07	8022.17	-38.3	479.23
1	2255.67	2297.49	2670.52	1748.77	3624.18	31945.7	73893.6	-1442.98	110.76	1723.35	2838.1	1426.11	335.13	-4315.01	7884.48	-137.66	245.43
1	2276	2311.27	2681.75	1665.66	3487.64	15176.9	80662.4	-1479.86	95.78	1759.7	2866.1	1411.14	347.21	-4355.29	7838.45	-148.76	344.69
1	2296.32	2293.31	2647.75	1741.59	3627.27	18346.7	89586.5	-1455.67	108.93	1712.63	2828.88	1417.56	341.39	-4349.82	7987.75	-97.41	410.51
1	2316.64	2297.14	2640.12	1665.68	3486.53	9783.21	79392.9	-1477.54	87.53	1702.78	2850.4	1421.61	336.89	-4316.46	7882.84	-25.43	387.15
1	2336.96	2317.14	2722.54	1736.9	3511.22	34928.6	78542.8	-1458.33	100.1	1870.78	2851.88	1413.91	348.26	-4381.18	7978.67	87.37	493.49
1	2357.28	2319.09	2683.75	1652.97	3499.25	22516.2	70600.8	-1456.72	77.15	1806.62	2858.27	1434.86	349.66	-4390.07	7867.62	-221.25	333.97
1	2377.6	2323.92	2737.73	1710.39	3571.48	14646.1	79237.1	-1448.79	100.86	1715.59	2879.7	1402.4	329.93	-4329.47	7967.32	-137.89	442.19
1	2397.92	2324.4	2716.75	1659.85	3517.92	27374.6	78015.3	-1433.18	89.29	1701.66	2864.36	1410.09	339.29	-4306.79	8080.64	-123.35	366.02
1	2418.24	2321.52	2685.27	1743.5	3583.86	17790.5	62568.7	-1451.85	106.9	1707.03	2848.1	1417.96	360	-4389.11	8006.86	-64.91	329.03
1	2438.57	2341.54	2771.79	1776.29	3626.54	22321.5	91233	-1441.69	96.38	1692.48	2880.57	1403.19	346.77	-4399.9	7742.75	-174.7	351.43
1	2458.89	2325.78	2709.71	1727.65	3536.09	34906.6	74977	-1447.09	100.41	1750.49	2908.54	1418.09	362.63	-4406.23	7793.24	28.48	634.24
1	2479.21	2325.74	2741.3	1780.67	3656.13	11515.9	77651.4	-1448.88	108.1	1864.85	2869.4	1420.51	356.26	-4374.31	7819.86	47.6	595.77
1	2499.54	2313.32	2684.91	1732.03	3604.78	24901.3	70132.5	-1445.04	87.15	1723.71	2833.65	1407.16	343.11	-4397.9	8039.47	-36.68	512.19
1	2519.86	2314.42	2639.86	1738.08	3576.56	11934.4	69476.5	-1451.61	102.23	1842.91	2792.57	1402.55	336.88	-4369.36	7795.37	28.13	472.34
1	2540.18	2334.75	2697.17	1740.65	3582.22	18605.4	80151.4	-1466.69	85.9	1717.29	2865.55	1400.88	358.06	-4387.53	7857.36	181.96	540.06
1	2560.5	2326.32	2691.94	1754.27	3607.42	24761.8	77109.9	-1456.87	98.23	1780.16	2909.72	1417.57	370.79	-4390.3	8033.66	59.55	358.42
1	2580.82	2313.46	2629.95	1697.17	3533.62	7432.9	81376.2	-1452.77	96.13	1828.21	2869.27	1390.15	355.17	-4334.9	7947.24	65.84	385.02
1	2601.14	2337.37	2691.16	1675.67	3496.26	33179	82037.7	-1441.76	104.6	1810.06	2873.55	1385.52	349.5	-4386.87	8032.85	-167.35	514.79
1	2621.46	2334.23	2694.58	1739.13	3565.37	10568.9	68122	-1446.66	119.4	1778.83	2857.47	1407.37	359.85	-4325.09	7996.2	-62.26	499.07
1	2641.78	2325.28	2698.67	1789.32	3636.12	26156.8	96111.7	-1465.67	108.56	1729.02	2869.63	1380.35	341.95	-4354.47	7970.98	-68.81	494.06
1	2662.1	2348.14	2667.2	1769.47	3631.36	33357.4	82047.7	-1448.91	85.29	1695.72	2862.2	1371.67	338.45	-4371.71	7689.31	27.49	457.66
1	2682.42	2349.16	2682.16	1694.88	3500.95	4395.5	80095	-1440.43	91.5	1720.24	2907.87	1386.88	341.02	-4356.06	7923.29	-55.29	531.5
1	2702.74	2340.15	2702.56	1748.79	3584.44	21892.5	87591.3	-1417.13	106.16	1813.41	2899.19	1396.77	339.45	-4317.48	7954.28	-53.99	453.2
1	2723.06	2346.37	2695.16	1760.12	3587.09	19190.2	69904.6	-1425.62	86.79	1777.67	2853.76	1372.98	351.34	-4357.58	7670.8	-100.09	511.24
1	2743.39	2344.64	2742.59	1712.63	3520.39	4639.83	82390.7	-1442.37	83.95	1855.16	2840.21	1374.99	344.14	-4248.48	7944.52	13.07	331.17
1	2763.71	2357.73	2732.26	1769.53	3623.26	12491.5	79880.4	-1443.05	103.92	1741.02	2902.15	1364.64	342.85	-4347.6	7919.39	113.69	628.29
1	2784.03	2362.02	2748.76	1698.02	3500.6	8109.83	75635	-1440.53	116.3	1707.8	2871.4	1370.04	332.9	-4361.28	7925.36	121.54	486.42
1	2804.36	2330	2690.51	1694.59	3532.82	43892.9	76380.2	-1456.94	90.61	1735.14	2880.35	1367.4	338.72	-4368.38	7816.01	-146.37	525.63
1	2824.68	2322.63	2666.26	1672.87	3459.2	7558.17	74401.2	-1415.07	109.13	1815.98	2863.6	1378.41	353.04	-4346.44	7866.96	-186.43	413.36
1	2845	2334.73	2710.66	1691.37	3487.46	14291.2	74203.8	-1425.59	106.57	1766.15	2839.3	1395.94	369.45	-4370.41	8036.23	-184.7	572.97
1	2865.33	2333.27	2705.6	1665.34	3475.59	19199.7	81923.8	-1439.12	94.45	1758.82	2887.05	1356.83	337.55	-4338.34	7820.29	-306.44	287.82
1	2885.65	2338.25	2732.82	1722.43	3565.38	18629.2	69420.2	-1406.64	82.54	1742.09	2843.87	1356.06	340.79	-4268.45	7934.03	82.29	449.09
1	2905.97	2335.43	2749.23	1710.82	3519.54	18535.6	75366.4	-1437.88	86.22	1789.58	2861.63	1359.02	338.02	-4307.59	7902.56	-85.23	502.85
1	2926.29	2311.06	2671.19	1692.43	3540.98	12397.5	74432.9	-1419.04	103.77	1662.48	2877.28	1356.2	349.81	-4303.24	7883.02	-144.77	348.15
1	2946.62	2333.61	2689.27	1790.03	3610.72	4010.37	81445.1	-1400.94	102.92	1723.57	2866	1337.18	329.73	-4294.21	7963.52	-72.53	273.33
1	2966.94	2317.1	2647.71	1735.84	3548.5	28298.2	78028.9	-1425.26	105.64	1791.26	2869.06	1360.46	347.17	-4280.56	7908.52	-27.4	357.25
1	2987.26	2326.91	2701.99	1648.61	3435.04	25631.3	92291.4	-1386.32	105.52	1768.66	2818.4	1365.95	360.73	-4307.23	7759.77	-57.93	444.3
1	3007.58	2330.81	2739.62	1722.19	3496.36	11447.5	77098.4	-1416.86	89.76	1740.33	2866.39	1340.04	343.24	-4345.7	7806.01	-205.59	350.09
1	3027.9	2319.29	2669.54	1721.88	3569.05	36237.4	75727.9	-1409.3	91.14	1730.01	2868.87	1346.64	350.5	-4299.93	7750.02	-116.31	340.6
1	3048.22	2316.5	2676.77	1682.12	3507.07	19565.3	71682.8	-1390.96	92.98	1781.55	2834.55	1339.5	344.61	-4310.4	7764.09	-195.46	413.53
1	3068.54	2344.75	2731.72	1716.61	3536.86	31731.5	71213.3	-1400.32	95.31	1684.46	2857.26	1345.66	343.85	-4306.56	7988.62	-101.92	374.99
1	3088.86	2326.96	2701.07	1696.87	3485.35	26926.3	82547.3	-1392.24	73.93	1739.25	2839.25	1335.05	336.04	-4311.77	8149.76	-105.85	432.86
1	3109.19	2319.11	2673.85	1712.22	3510.67	4523.69	66106	-1407.77	87.94	1917.51	2818.37	1351.23	360	-4306.42	7745.74	-172.61	215.62
1	3129.51	2313.72	2681.41	1672.76	3463.06	22812.6	66852.1	-1408.84	99.12	1643.06	2840.14	1331.06	340.06	-4318.49	7739.75	-84.08	477.89
1	3149.83	2330.28	2704.6	1641.4	3416.13	28735.7	72451.3	-1380.17	91.5	1754.14	2844.38	1339.37	350.92	-4284.16	7737.32	-45.25	267.52
1	3170.15	2321.8	2700.6	1688.01	3470.9	19323.6	65478.1	-1393.32	101.19	1794.93	2847.94	1320.96	340.6	-4249.31	7715.66	-85.26	414.54
1	3190.47	2315.43	2681.7	1717.34	3512.3	15489.5	79836.5	-1399.2	107.5	1836.87	2845.01	1341.23	352.02	-4219.95	7691.75	49	398.39
1	3210.79	2313.19	2641.31	1696.68	3477.4	10213.6	63446.8	-1366.96	100.35	1692.83	2877.9	1328.91	347.84	-4254.45	7859.7	50.83	435.91
1	3231.12	2333.84	2716.08	1680	3476.55	15406.7	73749	-1372.68	101.26	1707.95	2831.76	1353.3	353.6	-4269.81	8032.6	-179.46	393.02
1	3251.44	2327.53	2693.52	1659.52	3457.66	17601.5	65822.1	-1379.76	87.82	1757.23	2850.93	1345.9	370.71	-4262.6	7769.89	-45.94	396.25
1	3271.76	2318.94	2662.9	1675.3	3425.74	28463.5	70100.4	-1387.01	77.97	1736.92	2849.14	1332.86	350.34	-4265.81	7800.02	-89.14	387.66
1	3292.08	2317.76	2641.01	1658.73	3453.34	34879.3	73600.8	-1398.25	96.48	1735.18	2856.14	1319.84	335.55	-4327.35	7774.74	-153.87	420.77
1	3312.4	2315.13	2716.04	1663.51	3474.48	31025.2	69622	-1393.67	92.74	1779.61	2863.5	1321.07	345.98	-4253.61	7808.16	-185.37	391.82
1	3332.72	2298.88	2656.14	1691.58	3486.08	19372.2	63718.8	-1362.09	78.97	1782.58	2833.2	1310.17	353.97	-4247.04	7841.04	-45.46	386.78
1	3353.04	2314.42	2668.78	1704.35	3484.71	-34.43	65186.9	-1381.69	106.42	1708.01	2840.83	1326.9	356.43	-4225.24	7635.66	-74.37	400.34
1	3373.37	2323.24	2708.89	1730.43	3503.04	17968.7	55282.6	-1388.69	102.06	1801.86	2824.44	1333.65	357.17	-4215.61	8171.99	-37.12	393.59
1	3393.69	2309.36	2667.9	1689.84	3510.82	33581	69112	-1377.69	88.89	1817.97	2846.52	1322.03	356.63	-4228.12	8030.55	30.14	549.44
1	3414.01	2312.49	2666.45	1676.08	3448.69	36453.7	77000.4	-1354.74	110.37	1699.09	2844.29	1321.4	351.81	-4246.23	7969.91	14.45	415.73
1	3434.33	2323.34	2672.84	1658.77	3473.76	17178.2	65311.3	-1373.77	97.59	1705.75	2830.66	1308.76	346.03	-4245.18	7699.64	0.28	508.51
1	3454.65	2333	2682.48	1683.36	3456.9	21482.9	65146.4	-1374.33	87.76	1849.27	2779.94	1309.79	344.61	-4241.52	7719.46	-111.77	492.37
1	3474.97	2328.41	2663.71	1736.59	3505.12	20589.2	61769.6	-1374.92	102.5	1782.78	2801.67	1332.05	360.27	-4265.74	7734.91	1.45	495.43
1	3495.29	2297.26	2619.98	1625.91	3417.82	9647.07	71901.3	-1381.1	104.39	1753.85	2816.28	1334.32	358.39	-4266.2	7827.86	90.31	497.64
1	3515.61	2328.93	2712.23	1642.49	3414.09	15088.9	65746.7	-1352.28	100.04	1747.6	2813.08	1299.74	356.43	-4248.87	7564.03	-87.34	428.1
1	3535.93	2313.35	2693.75	1712.01	3502.22	36861.2	78642.1	-1374.96	87.06	1685.76	2836.58	1301.81	342.38	-4259.48	7578.16	-13.91	427.99
1	3556.25	2329.73	2733.55	1658.17	3444.32	25250.4	81156.3	-1368.16	85.56	1659.25	2831.95	1273.67	322.53	-4224.33	7704.99	-66.14	374.04
1	3576.57	2302.02	2651.78	1678.38	3448.56	20416.7	70562.2	-1371.38	82.25	1747.35	2862.38	1308.38	345.7	-4221.46	7869.66	33.27	347.57
1	3596.89	2320.46	2695.75	1681.1	3486.07	10424	84344.5	-1373.43	103.33	1744.19	2831.72	1294.76	343.24	-4228.17	7731.13	-15.77	467.81
[truncated: 30 more columns]
