# Supplementary material for: Comparative Room Burn Study of Furnished Rooms from the United Kingdom, France and the United States
Source: Springer Nature journal article supplement (doi:10.1007/s10694-019-00888-8), 2019-07-16
Supplement: MOESM12 [file 16938730]

## Sheet: 18-317ACC-US3Door
Version=1
NumMeasures=000177
NumComponents=8
Usage=0
SystemID=
Title=Tue Nov 13 14:17:15 2018 (GMT-06:00)
Description=
NumMethods=1
MethodNumComponents1=8
MethodTitle1=PRis	All gases except NO 2016
NumLimits=0008
UseLimit=0	0	0	0	0	0	0	0
LowerLimit=0.000	0	0	0	0	0	0	0
UpperLimit=0.000	0	0	0	0	0	0	0
StartTime=13Nov18142602
EndTime=13Nov18152558
DataTable
Sequence	Time	CO2	(+)CO2	CO	(+)CO	HCl	(+)HCl	HF	(+)HF	SO2	(+)SO2	NO2	(+)NO2	HBr	(+)HBr	HCN	(+)HCN
		ppm	(+)ppm		ppm	(+)ppm	ppm	(+)ppm		ppm	(+)ppm	ppm	(+)ppm	ppm	(+)ppm		ppm	(+)ppm	ppm	(+)ppm	ppm	(+)ppm	ppm	(+)ppm		ppm	(+)ppm	ppm	(+)ppm	ppm	(+)ppm	ppm	(+)ppm	ppm	(+)ppm		ppm	(+)ppm	ppm	(+)ppm	ppm	(+)ppm	ppm	(+)ppm	ppm	(+)ppm	ppm	(+)ppm
1	20.46	50.75	217.47	-74	90.6	-29139.7	24960.8	30.5	81.21	-9.55	266.22	-9.45	76.03	47.95	1279.22	-118.92	248.22
1	40.78	116.96	224.04	-7.74	21.76	2192.92	22019.7	82.92	73.74	-212.91	73.97	10.38	85.8	-80.66	534.33	-24.48	126.41
1	61.11	109.05	445.09	-75.53	56.83	5398.45	21331.7	-9.66	45.07	281.65	232.9	-15.55	48.77	-21.71	878.52	-328.68	45.29
1	81.43	142.62	447.15	-27.61	45.15	8267.26	47941.6	13.01	42.29	-93.29	222.24	-32.41	30.19	-46.6	1096.75	1.2	290.23
1	101.75	136.04	472.96	-189.33	263.89	-42094.4	21630.4	76.15	25.04	64.08	176.46	-25.32	60.97	85.55	1109.14	128.35	13.5
1	122.07	104.42	261.52	-128.26	204.33	-4229.97	69362.4	0.69	69.82	74.48	77.85	-30.63	39.49	16.4	907.25	-325.52	46.92
1	142.4	-33.47	140.59	-52.58	72.94	-28791.3	28285.5	15.87	41.98	179.74	154.46	-54.26	45.19	3.98	962.31	-54.77	66.09
1	162.72	159.85	417.51	-143.07	124.58	-16524.7	16550.2	29.4	45.03	156.85	294.24	-32.42	40.3	-101.12	838.6	45.77	69.08
1	183.04	410.52	441.27	-16.9	38.69	-26015.4	29080.3	74.54	40.43	137.2	121.51	-31.71	50.5	150.49	651.25	-13.01	62.63
1	203.36	735.73	812.41	85.9	134.98	-44458.9	6350.26	39.93	43.26	89.24	127.84	-37.3	25.76	131.59	1885.21	-221.58	126.44
1	223.68	2063.63	865.16	-66.05	128.51	-19868.5	38483.2	38.78	78.79	-87.19	177.5	-56.61	42.6	45.38	1505.44	-234.69	129.12
1	244	4215.67	3412.63	-84.04	76.43	11715.7	29559	57.57	38.99	146.25	315.42	-32.46	45.61	-13.13	1222.05	366.17	398.99
1	264.32	11269.2	30508.1	1.44	47.5	-22582.4	18505.8	41.69	34.96	120.95	144.55	-16.42	32.67	-4.71	944.52	-314.86	177.44
1	284.64	24205.7	386931	145.5	72.86	-21227.2	21554.8	28.94	14.32	-66.53	119.45	-37.27	15.69	-63.55	1070.4	-71.8	123.35
1	304.96	17881.2	412198	173.78	60.86	-20518.6	23149	68.26	21.56	91.98	187.47	-32.77	22.28	50.24	1768.01	-119.15	23.41
1	325.28	-41261.2	222927	450.73	41.79	23002.5	25415.7	-6.49	15.6	20.41	338.2	-40.29	40.45	43.38	1051	-244.29	174.19
1	345.6	47491.4	423376	782.8	62.94	-47996	34074.2	29.48	41.35	51.49	230.03	-42.65	61.07	59.38	1653.7	-22.05	306.24
1	365.92	35106	22062.8	796.53	272.04	-39088.3	37452.1	48.94	25.83	115.12	142.44	-19.73	33.22	18.86	1812.02	20.28	20.11
1	386.24	4342.18	253750	1260.32	217.84	-1265.57	50870.4	58.98	87.92	1.68	192.82	-17.9	58.79	0.42	2203.64	-102.82	93.59
1	406.57	-34725.7	272510	3621.06	1623.6	858.12	45124.3	16.23	29.9	143.41	190.22	-4.98	66.23	68.36	1637.54	-369.53	334.46
1	426.89	35106	22062.8	14715.9	10899.2	38785.2	117885	52.51	37.5	211.5	213.42	-32.52	167.39	44.44	1398.15	652.39	569.6
1	447.21	-40721.4	200181	21947.8	19125.8	31514.8	231118	-30.83	63.41	396.54	724.79	61.58	233.89	6.95	1877.92	564.47	1873.36
1	467.53	7284.76	298031	30623.9	26917.4	81089	214912	-47.58	36.15	214.73	667.67	77.48	357.01	-209.84	2512.45	763.32	2146.7
1	487.85	-40840.3	216830	30577.2	27140.3	68208.8	269455	-84.66	45.78	272.11	880.06	100.59	391.06	-205.96	1012.27	1599.06	1542.35
1	508.17	43993.1	279344	26128.3	23217.8	58194.7	154762	-38.34	69.8	51.11	607.37	96.04	477.47	-376.62	2034.23	1413.09	1877.99
1	528.49	66401.9	415686	26549.2	23316	62524.9	306322	-70.35	63.08	66	542.52	141.85	500.03	-451.12	1247.29	1130.68	684.72
1	548.81	-27489.8	350671	25260.9	21367.3	50514.2	139561	-86.56	46.33	53.11	341.42	122.11	580.76	-472.5	1523.78	1031.4	176.36
1	569.13	25143.8	357901	28712.7	28292.3	122254	143353	-123.14	55.94	-116.38	552.7	180.19	595.29	-459.89	3393.87	1417.02	337.47
1	589.46	13683.7	100675	27524.1	24288.8	68908.1	221151	-699.32	156.08	508.07	905.77	689.85	783.77	-1555.63	2930.88	2776.59	529.34
1	609.78	77438.1	261576	31185.8	22364	97431.5	144447	-1439.23	72.46	1155.69	2009.37	691.25	861.09	-3080.31	5213.63	2533.93	744.57
1	630.1	27773.4	55512.6	31287.9	22505.7	-19660.3	363349	-2097.7	271.22	2858.78	3427.9	1223.7	979.43	-4947.19	11237.8	401.99	355.16
1	650.42	23965.5	32638.5	38290.6	11254.2	-421044	682874	-3074.18	1171.1	3640.07	5110.88	1240.56	1194.85	-7840	18964.6	228.54	595.05
1	670.74	66997.8	359343	27320	14064.8	531483	1.39521e+06	-3053.3	635.32	4475.84	5975.13	1802.58	865.15	-7836.76	25338.8	-4.38	673.52
1	691.06	3644.7	400846	27532.7	4078.84	-4625060	9101660	-5015.3	756.73	3302.18	6524.55	1900.65	960.91	-11125.2	59138.5	4298.7	7346.56
1	711.38	78439	265746	29240.7	14972.1	258569	679678	-3677.34	1577.15	7856.62	5749.94	1630.57	1238.22	-11356.6	27156	325646	1.51361e+06
1	731.7	42598.8	115509	24592.9	7867.4	10361677	3.6264e+06	-3510.1	1309.48	6627.09	6263.47	2747.73	813.66	-12268.8	42196.2	2895.19	4884.8
1	752.02	863.56	373290	32440.8	3616.8	1.11419e+06	11303455	-4666.4	1005.57	8428.96	8294.05	2189.21	1426.74	-13837.3	21103.8	-2749.65	3602.3
1	772.34	-393.66	61833.4	22600.8	8688.69	-6787091	9666603	-5402.3	875.46	5108.09	6540.36	2269.98	978.2	-12297.2	47482	-435.36	38180.9
1	792.66	-42127.7	209342	26072.8	3820.07	1.90665e+06	1.70521e+06	-4170.17	806.33	6175.21	8111.74	2151.75	1083.76	-9633.73	20465.1	716.63	824.84
1	812.98	-43808.6	192702	16337.2	4769.1	705494	473499	-3227.55	889	5726	6044.29	2153.28	1235.53	-8557.8	21195.5	54330.9	141949
1	833.3	79109.8	400273	11089.5	5196.18	-1.076e+06	1046078	-3333.94	261.66	3982.7	6993.77	2167.34	1012.32	-8244.73	17545	119.84	1547.67
1	853.62	35106	22062.8	8761.33	4591.01	-109116	227124	-2348.08	800.74	5373.8	4723.31	1683.67	1228.99	-7862.75	22604	-1101.99	9255.52
1	873.94	8697.92	26313.7	10244.4	6306.81	9110297	10043547	-2668.33	658.48	5881.67	4538.11	1871.83	1228.36	-7566.52	18490	6986.9	19125.1
1	894.26	29156.8	370520	8544.41	6336.04	639984	778647	-2313.03	626.04	5503.54	4637.48	1913.15	937.18	-6848.83	24104.7	2784.63	1956.43
1	914.58	95173.4	320467	8176.21	7383.37	-5809905	6.62702e+06	-2873.1	372.86	6723.91	4674.23	2089.09	957.89	-7672.21	20462.9	14683	24383.8
1	934.9	59046.4	368179	7218.43	7837.46	4288367	9813454	-3175.49	495.32	6203.97	5296.66	2438.05	1053.56	-8420.73	15376.7	-246485	1.48206e+06
1	955.23	8935.73	272437	6141.7	8019.02	-471328	688749	-2985.88	387.19	5422.28	4743.05	1970.49	1146.48	-7551.46	17430.8	2498.9	1394.55
1	975.55	-4674.7	229386	3996.3	6867.98	-761063	584070	-3073.9	396.94	2355.96	5392.15	2106.71	1177.56	-7981.6	13185.9	2082.17	729.25
1	995.87	26941.7	333645	4199.03	7913.53	8194577	8539132	-2994.42	484.58	2877.41	5393	1775.03	1222.43	-7556.2	15214.6	-3425.74	7839.48
1	1016.19	837.43	385490	3825.14	7615.25	-1.10329e+06	654442	-2907.08	474.79	3332	4836.97	2494.87	564.28	-7780.63	13155.5	-266092	2.41323e+06
1	1036.52	12188.9	16341.4	3619.62	7649.53	139679	521254	-3169.46	350.16	1898.56	5545.63	1762.86	1006.14	-8697.99	14783.2	-2129.28	10315.4
1	1056.84	-37687.7	276224	3649.36	7162.9	388859	642862	-2545.68	713.68	3603.98	4984.86	2059.11	824.34	-7265.59	14047.7	-1663.57	1872
1	1077.16	56364.3	328364	3592.77	7864.71	990427	750732	-2535.98	454.39	5071.17	5207.07	1852.13	801.23	-8064.32	17451.7	4621.43	6082.46
1	1097.48	34755.3	220229	4339.9	8410.12	-2511064	8402530	-2928.44	417.61	4275.91	5856.75	2029.91	646.82	-6140.27	21899.4	6977.4	13084.4
1	1117.8	89421.8	358964	3589.57	7352.74	60217.4	406201	-2957.62	686.3	3570.87	5285.23	1618.86	883.2	-6854.77	16953.3	1030.89	3146.73
1	1138.12	-18015.6	314600	4134.72	7255.62	351987	755108	-3105.58	462.28	1467.15	5406.3	1764.53	850.24	-7217.91	15362.1	1394.45	14864.2
1	1158.44	81351.6	300815	5047.88	6194.42	1.25318e+06	1.0369e+06	-2579.19	429.5	1164.89	5467.57	1995.8	558.05	-7248.52	16195.7	-1541.89	1419.73
1	1178.77	91628.7	268809	6318.9	7368.18	647618	437499	-2740.05	1148.79	2906.98	4524.18	2006.42	545.87	-7991.24	14554.4	-1175.08	7579.05
1	1199.09	20563.4	35982.2	5521.76	7253.63	-7201003	9897563	-2780.92	1405.4	4058.89	5280.79	1645.54	825.66	-7775.91	16039.5	-1533.64	3889.45
1	1219.41	-42401.4	204634	5558.36	6628.12	15251428	10766419	-2982.84	400.48	2902.11	6133.67	1957.76	605.88	-7597.15	16493.9	-3906.49	3192.05
1	1239.73	20506.4	406236	6036.23	7338.79	480274	585852	-3212.74	522.58	3381.66	5228.95	1885.69	600.9	-7540.05	24713.6	-13332.2	34485.2
1	1260.05	95177.3	300175	6117.15	7521.15	-4.53816e+06	6.02213e+06	-2747.9	187.43	3923.18	5231.16	1720.72	644.17	-7827.19	10289	-9586.44	37527.8
1	1280.37	77560.2	294242	5776.07	7848.38	12760866	10819955	-2872.24	704.75	3128.32	4947.04	1808.65	442.52	-6921.61	17587.8	-1878.81	3799.42
1	1300.69	43390.7	280087	5978.9	6876.59	-8352048	8751611	-3296.17	164.85	3541.52	5547.23	1857.67	389.58	-7436.12	19320.8	-1367.61	2619.07
1	1321.01	35106	22062.8	6263.68	7312.1	512572	110014	-2733.1	333.25	2047.49	5403.57	1816.03	558.54	-7932.75	16249.8	10680	11462.9
1	1341.33	12360.3	356334	5196.94	6858.68	-273095	648921	-2707.41	416.8	2817.27	6223.97	1743.06	706.17	-7691.21	19271.3	-1636.62	1732.65
1	1361.65	76241.4	304782	5687.71	7676.03	-406647	867133	-2734.61	198.13	3376.83	4746.13	1731.63	558.8	-7098.82	14377.9	-9256.16	14039.5
1	1381.98	24937.4	173326	5030.49	6752.98	-482231	278642	-2832.33	288.94	4081.54	4968.69	1811.7	502.56	-8349.67	17664.2	-3854.71	4998.75
1	1402.3	83343.9	184014	5365.97	7355.2	-1.95681e+06	7120861	-2968.9	530.15	3544.03	5785.92	1606.31	491.31	-7462.93	15639	-97224.3	1.92647e+06
1	1422.62	-42331.6	198711	4075.11	6653.16	-534222	1.17681e+06	-2639.6	507.5	3388.76	4345.66	1780.2	446.58	-8355.7	12518.2	56713.8	82893.5
1	1442.94	84285.4	174591	4110.63	6031.91	-39995.3	618968	-2615.03	502.76	5174.44	4644.62	1696.01	482.91	-7918.17	22225.2	-1210.03	3631.27
1	1463.27	35106	22062.8	4559.63	6394.76	-8617987	8.30642e+06	-2503.67	440.34	4015	4672.65	1589.42	498.28	-8065.09	16067.5	9387.16	8256.77
1	1483.59	46326.5	319138	5719.73	7669.98	920981	639678	-2537.91	905.5	3979.97	4918.36	1444.58	997.69	-7334.37	17239.7	-189424	1111648
1	1503.91	6101.13	7251.7	3801.33	7252.33	-893740	966450	-3145.81	502.92	4384.68	5237.67	1740.49	339.38	-8210.67	16184.6	200315	1.69811e+06
1	1524.23	4512.79	4649.62	2929.01	6076.92	3.05716e+06	10573915	-2849.65	866.94	2010.35	5561.84	1772.22	231.09	-7586.24	24672.6	11012.9	10109.1
1	1544.55	4421.87	5203.23	3343.66	7165.53	-434181	846514	-2937.35	124.74	2209.67	6044.8	1588.38	196.12	-7819.39	20363.2	3330.48	7798.73
1	1564.87	4458.38	3683.99	3887.66	7268.96	-1.16398e+06	13365798	-2785.27	440.99	2661.56	5850.28	1653.98	393.05	-8272.58	13997.6	2679.17	5372.39
1	1585.19	4255.46	4220.96	3579.63	6902.04	-385935	475196	-2752.94	352.58	2236.1	5588.7	1656.18	316.03	-8447.5	14401.3	-60137.4	243033
1	1605.51	4431.99	3671.78	3233.78	6376.63	-187454	618157	-3011.21	228.54	2009.47	4602.31	1791.67	408.17	-7291.65	17154.9	645.39	1831.28
1	1625.83	4418.01	3833.21	3544.75	6987.27	172510	899720	-2781.89	703.7	3202.87	4896.61	1684.23	366.75	-7253.46	15642.9	-115.31	1269.27
1	1646.16	4174.53	4150.45	3461.19	6707.16	3.66476e+06	11246154	-3032.23	427.9	2748.07	4751.45	1609.13	223.94	-7055.99	11976.5	-8686.75	40478
1	1666.48	4195.49	4269.16	2880.19	5807.23	-1.18925e+06	10209684	-2871.3	389.49	4000.19	5118.52	1414.76	256.78	-7773.27	14779.6	-13708.4	25502.8
1	1686.8	4625.39	5457.21	3572.11	7890.22	-591892	10295986	-2319.18	183.82	5597.42	4214.14	1879.36	604.01	-7711.18	15722.3	3032.41	13793.4
1	1707.12	4509.76	4726.29	3640.26	7662.85	707217	745537	-2384.66	382.72	4168.76	4730.68	1678.27	380.57	-7823.71	21758.8	2054.48	3477
1	1727.44	4490.16	3502.96	3597.44	6883.13	-1.2085e+06	10607258	-3103.61	198.71	2308.17	4920.43	1797.08	502.13	-9481.5	16251.1	3633.87	9851.87
1	1747.76	4902.15	6365.22	3298.92	6657.27	211990	807566	-2589.82	390.3	4631.17	5398.88	1746.73	541.53	-7076.35	22746.4	917.07	5192.2
1	1768.08	4303.78	3847.24	3231.36	6153.02	211524	914282	-2393.89	555.55	3860.59	4846.89	1638.01	419.11	-7348.01	15867.4	4288.22	4862.84
1	1788.4	4787.21	4642.23	2449.74	5385.77	-1.03355e+06	10902310	-3185.74	192.42	2834.32	5447.62	1382.8	287.21	-6444.96	16401.5	3674.7	6035.23
1	1808.72	4498.8	4349.75	2996.3	6022.69	30053	415652	-2943.62	117.96	5442.3	5661.33	1525.64	412.64	-8893.78	18530.1	606.91	4756.39
1	1829.04	4330.96	3591.43	3116.02	6297.5	527772	598980	-2971.2	535.25	2864.23	5585.72	1445.81	364.25	-7809.65	16583.5	5117.04	13184.5
1	1849.36	4270.39	4116.49	3834.88	7048.59	30891	363311	-2539.44	397.32	3321.42	4897.93	1639.96	345.74	-7873.05	16233.6	-3041.79	7535.38
1	1869.68	4425.71	4527.82	3214.96	6340.69	-15283405	9811241	-2567.03	817.82	2348.04	5011.88	1777.19	519.38	-8159.82	20801.5	-1544.01	1159.54
1	1890	4506.57	4991.75	3754.72	7430.43	434991	738532	-2946.54	419.06	3778.28	5007.68	1899.29	631.1	-7678.85	13761.3	-913.53	3227.18
1	1910.32	4589.08	4430.31	2974.07	6484.31	-1.01895e+06	2.0483e+06	-3114.92	539.83	3110.66	4882.53	1538.15	442.65	-7063.61	17546.3	-2356.33	3116.64
1	1930.64	4328.66	5495.01	3160.74	6637.84	-906353	403058	-3268.47	578.94	4488.74	5174.63	1655.94	429.2	-7341.3	14861.1	-5472.61	2689.21
1	1950.96	4152.28	4041.03	3061.74	6306.14	-458004	388775	-3048.31	265.78	3123.42	5072.93	1794.05	520.42	-7666.62	25213.4	2150.34	3919.39
1	1971.28	4452.5	4975.46	3310.14	6920.67	-878942	1.55527e+06	-2786.27	312.19	3000.33	4854.19	1645.06	334.41	-6856.64	21340.6	2539.07	3339.26
1	1991.6	4360.38	4567.08	3202.44	6096.19	1.0936e+06	868524	-3288.43	858.21	3162.7	6017.78	1822.66	654.74	-6728.85	15201.3	-1259.67	1940.85
1	2011.92	4315.43	5102.38	3599.44	7369.01	816330	10709735	-2909.78	696.53	4172.13	5161.52	1483.63	343.21	-6177.51	18846.8	2070.74	5200.64
1	2032.24	4061.08	3858	3179.38	6639.17	6668.37	359622	-2803.47	466.32	3149.89	4870.94	1623.26	473.57	-7733.13	11804.1	620.53	2967.81
1	2052.56	4409.18	3872.5	3998.73	7389.46	72626.4	876882	-2840.8	926.08	3540.69	5191.64	1696.93	389.47	-7554.71	19715.7	-1054.91	865.21
1	2072.88	4563.27	4659.01	2594.17	5791.79	-228742	381759	-2867.08	906.56	3836.38	5633.88	1638.71	430.28	-7317.73	17661.5	-1504.1	1792.65
1	2093.21	4175.37	3080.26	2604.52	5877	-638129	429190	-2977.56	245.3	3820.44	4817.03	1523.43	377.22	-7290.14	21180.5	4015.12	3607.48
1	2113.53	4613.75	4818.86	4046.86	7558.74	-146353	761001	-3411.44	278.97	3557.35	4973.46	1355.65	283.74	-6933.74	20730.2	-1776.64	362.35
1	2133.85	4392.43	4554.45	3097.95	6125.2	44605.8	285363	-2619.17	521.45	3981.82	5716.74	1439.94	288.43	-6827.4	19363.8	-1534.04	1837.82
1	2154.17	4290.71	5056.74	3290.61	6600.15	323777	10478254	-2615.53	300.7	4402.05	5293.28	1795.91	545.5	-7275.13	15051.8	1811.86	4734.58
1	2174.49	4528.43	5227.28	3535.07	6775.06	600620	899627	-2994.76	1118.72	3529.55	5529.73	1649.51	550.91	-7196.06	16111	7097.66	3515.24
1	2194.81	4298.95	4700.28	3266.77	6227.51	149015	491981	-3023.54	330.21	4387.01	4862.18	1649.2	517.09	-6927.79	17921	374.9	25667
1	2215.13	4321.62	4508.32	3374.73	7159.08	-3.15059e+06	21282490	-2358.61	563.51	4157.55	4987.36	1477.3	337.49	-7760.19	12933.2	613.98	3546.64
1	2235.45	4422	5032.46	2955.8	6150.52	-710880	781109	-2840.36	594.49	2785.97	5232.04	1525.7	509.02	-7262.32	16424.3	3057.41	2579.04
1	2255.77	4259.72	4122.59	2704.94	5362.02	-562162	81891.4	-2619.13	406.22	3401.63	5789.63	1437.77	337.34	-7211.16	24682.5	1278.09	1326.29
1	2276.09	4237.98	3708.61	3574.79	6657.92	-735870	539697	-2602.37	327.32	3880.05	5150.29	1688.07	394.77	-7504.14	15797.6	11058.6	3900.6
1	2296.41	4478.32	4168.85	2554.93	5463.49	42258.7	885757	-2243.89	672.18	3498.72	4987.88	1710.85	429.07	-8434.19	13228	-1489.74	2027.21
1	2316.73	4238.42	4129.94	3214.18	6250.15	-38727.3	306672	-2861.55	448.79	3867.32	4824.03	1520.04	409.92	-7771	15266.5	525.12	7023.14
1	2337.05	4220.9	4565.43	3299.48	6529.56	731313	916583	-3141.12	372.18	4071.27	5438.37	1325.12	433.83	-6612.48	11773.2	-2378.66	5317.28
1	2357.37	4256.01	3710.85	3070.76	6588.12	8.00412e+06	9988442	-3224.63	793.71	3393.18	5624.68	1527.21	385.35	-8053.49	21925.9	16693.3	1.20015e+06
1	2377.7	4523.39	4761.36	3306.41	6744.78	-317514	499068	-2369.28	401.71	3930.41	5679.53	1427.41	246.28	-6819.69	16513.9	-907.12	7451.05
1	2398.02	4193.95	3467.75	3517.44	6574.36	173522	291246	-2804.87	583.42	5429.23	5186.26	1637.91	409.1	-8507.97	17814	3257.45	4852.6
1	2418.34	4298.6	3876.65	3422.7	6766.28	1.1806e+06	1.08695e+06	-2943.42	535.44	3855.58	5354.29	1714.18	558.16	-8264.67	19933.3	-553.01	8597.89
1	2438.66	4412.9	4135.8	3772.88	7118.52	6.53792e+06	8530790	-2229.61	281.81	3741.12	5230.38	1643.36	370.86	-7659.77	13665.6	4865.16	29066.9
1	2458.98	4622.59	5179.02	3450.9	6147.88	-197844	198398	-2760.62	256.91	1618.33	6389.6	1651.37	405.47	-7740.55	22378.2	1129.22	690.88
1	2479.3	4419.67	4529.49	3429.69	6604.65	-994105	661559	-2366.68	412.3	4171.2	5240.69	1595.09	405.57	-6814.08	15579	500.05	8001.42
1	2499.62	4371.85	3920.81	2536.06	6275.03	-269151	1.17709e+06	-2758.17	102	3503.75	5104.84	1604.39	521.72	-7929.67	15427.6	-9553.17	14410.7
1	2519.94	4560.43	5146.29	2716.37	5947.91	117501	187929	-3220.49	509.61	1518.61	4659.07	1578.19	339.1	-8073.17	14759.1	3039.39	3344.34
1	2540.26	4672.66	5147.06	3892.07	7152.15	173398	787836	-3147.96	533.37	3631.26	4736.34	1315.08	275.75	-7065.34	17426.5	-800.71	477.22
1	2560.58	4379.28	4769.6	3505.35	6998.51	146728	865090	-3176.23	267.17	4061.04	5371.75	1671.19	454.43	-7969.18	14676.1	-5824.4	10205
1	2580.9	4433.61	4923.43	2465.92	5383.63	-3.91523e+06	9416180	-2518.02	341.24	3009.55	5401.49	1384.91	343.5	-7359.63	18328.9	-7697.06	17463.2
1	2601.22	4625.75	5122.44	3121.42	6243.7	671106	895086	-2870.21	369.41	4067.8	5218.42	1534.12	285.7	-7550.87	14083	117.21	1217.22
1	2621.54	4830.11	4799.68	3686.56	7145.89	-185477	933026	-2632.69	335.82	3399.37	5076.36	1296.26	282.24	-7122.74	16975.1	685.19	1428.02
1	2641.86	4497.31	4730.68	3771.7	7008.17	119579	488181	-2510.23	618.06	3571.99	5068.06	1564.15	342.56	-8315.18	17393.9	-866.43	3329.11
1	2662.18	4490.17	4799.78	2892.59	5660.23	-3131943	6763544	-3021.35	411.21	3506.83	5743.07	1497.84	387.16	-6292.39	16923.6	871.35	2878.61
1	2682.5	4675.76	4359.57	3781.48	7275.76	364777	5124344	-3111.04	298.37	3568.28	4763	1525.15	444.08	-7182.52	16534.5	1647.8	2794.68
1	2702.82	4400.05	4566.06	2904.22	6237.48	62466.9	288633	-2759.35	271.37	3771.6	5094.37	1628.31	372.67	-8095.8	13176.8	-3512.78	1610.08
1	2723.14	4479	5298.54	4008.79	7278.66	-100199	825962	-2794.22	394.4	3901.75	4373.55	1405.57	329.27	-7633.52	16244.2	724.54	8111.24
1	2743.47	4380.59	3883.93	3674.15	7102.38	3.57491e+06	2.66939e+06	-2820.89	591.12	2908.35	5123.49	1616.11	386.49	-7646.4	20498.5	-2045.3	3402.82
1	2763.79	4530.87	4659.78	2507.84	5789.57	220319	778447	-2624.39	409.67	4360.73	4737.01	1504.56	425.6	-7714.02	14573.3	435.52	1097.94
1	2784.11	4539.38	4166.9	3750.59	7299.45	-499397	1087795	-3259.16	247.99	2410.55	6580.99	1656.43	443.7	-7297.77	15370.9	-132.49	1529.11
1	2804.43	4483.17	5461.28	3484.91	6538.53	614792	634699	-2469.64	197.84	2714.09	5180.79	1576.4	388.83	-6358.82	17507.9	1383.67	5148.26
1	2824.75	4510.23	4243.76	3488.8	6654.46	-227955	106291	-2984.92	177.73	2993.42	4970.14	1452.69	385.48	-7306.81	15685.7	-1528.99	13221.5
1	2845.07	4385.86	3682.94	2900.26	6594.37	495296	187933	-3002.9	558.19	2972.09	4736.48	1657.79	421.18	-7254.68	13989.8	5.26	2014.52
1	2865.39	4209.65	3656.36	2794.09	5956.92	380154	292258	-2811.17	329.5	3561.56	5444.14	1525.66	392.58	-7178.52	16009.1	1955.97	6539.14
1	2885.71	4561.14	5098.86	3232.71	6281.69	-181695	321710	-2572.91	402.07	3555.63	5452.76	1526.16	343.07	-6400.45	16759.8	-292.3	425.25
1	2906.03	4516.1	4768.55	2321.96	5047.9	-182684	13025735	-2266.78	438.56	3004.68	5123.27	1670.13	425.53	-7776.59	17279	-4415.64	5011.51
1	2926.35	4484.9	4626.29	3307.07	6659.67	-1.0505e+06	1.2165e+06	-2861.49	447.81	2982.72	5480.82	1614.04	540.91	-6669.49	23903.3	582.29	1838.67
1	2946.67	4578.84	5088.82	2781.54	5892.76	-702742	216754	-3034.75	284.78	2081.72	5320.38	1682.58	468.8	-8115.45	18167.2	-1225.11	1844.36
1	2966.99	4830.67	5170.98	3570	6532.18	-24624.5	156674	-2854.14	600.11	1669.72	4950.83	1529.95	332.75	-8380.26	10825.5	694.01	1774.8
1	2987.31	4491.57	4690.84	3529.4	7256.29	431377	243517	-3221.23	299.91	2091.68	4807.63	1559.83	469.34	-7726.13	19672.2	-878.93	2718.24
1	3007.64	4784.05	5498.73	3453.73	6291.91	-568197	258263	-3112.79	279.83	2805.12	5340.11	1505.65	400.29	-7570.49	13586.4	-4589.11	5331.05
1	3027.96	4312.63	3801.59	3117.96	6216.08	-674817	601644	-3058.46	387.06	4989.98	5145.69	1705.16	640.3	-7495.34	25289.3	-14062.1	61985.3
1	3048.28	4574.1	4531.34	4195.13	8190.8	-427953	248605	-2566.45	415.18	3067.11	5460.08	1491.81	306.59	-8821.46	23490.8	-2347.91	3894.25
1	3068.6	4333.6	4062.8	3505.38	6912.49	926660	492924	-2862.45	549.62	3895	5024.12	1537.28	346.74	-8017.67	13072.9	394.82	2309.33
1	3088.92	4580.44	4933.55	2919.05	5752.65	3.73907e+06	11863601	-2828.13	184.77	4044.31	5222.04	1634.86	367.98	-7236.09	16908.1	11.04	1258.23
1	3109.24	4576.57	4686.09	2935.05	5958.98	-4730500	7.2297e+06	-2777.11	222.08	5117.89	4893.05	1429.29	410.96	-8302.25	14476.4	-606.59	789.75
1	3129.57	4417.63	4580.5	3783.87	7490.89	45499.1	581087	-2881.13	372.78	2956.06	6271.36	1672.44	597.42	-7942.54	29789	766.08	3013.76
1	3149.89	4446.54	4445.58	2949.16	5458.22	848289	226580	-2853.87	584.98	3860.28	5342.55	1502.3	413.95	-6532.85	13807.2	-2487.12	1146.78
1	3170.21	4531.82	4739.31	2736.1	6057	398854	131845	-2914.96	752.89	5024.51	4739.96	1528.59	319.8	-6810.06	21882.7	-7931.21	12009.5
1	3190.53	4576.16	5349.77	3749.67	7243.91	-720070	1.14419e+06	-2973.86	158.41	4736.97	5181.73	1468.36	346.05	-6310.62	17894.5	11177.5	17100.2
1	3210.85	4717.78	4648.09	3381.78	6820.36	16703371	7444174	-3403.73	151.05	2013.43	5453.87	1575.98	308.27	-7257.05	25011.1	580.19	480.26
1	3231.17	4296.89	4104.68	3854.7	7247.04	-1523771	8.27685e+06	-2512.37	363.11	4788.86	4999.6	1660.45	525.85	-7035.9	15342.8	2528.44	3933.64
1	3251.49	4549.35	4800.73	2741.11	5925.58	-344790	752210	-2735.12	418.96	3485.94	5220.61	1631.46	603.7	-7902.7	14619.8	1397.54	5281.2
1	3271.81	4414.93	4536.42	3589.96	7111.26	-97424.2	159382	-2907.07	628.82	4573.4	4675.61	1535.35	434.98	-8063.57	20324.2	2331.19	38724
1	3292.14	4768.27	6141.2	3295.28	6418.5	514912	1007496	-3058.79	321.92	3358.61	5215.08	1508.92	317.55	-7198.96	12925.8	4509.18	12090.8
1	3312.46	4634.31	4728.2	3012.21	6498.79	185709	319768	-2674.5	802.97	4713.33	4779.21	1553.78	438.39	-7890.05	19522	-2572.82	2279.84
1	3332.78	4515.12	4347.81	3638.79	7207.76	211394	270393	-2887.81	443.38	3771.91	4897.67	1686.37	478.47	-7150.67	16676.2	-959.25	8089.5
1	3353.1	4551.73	4409.06	2910.03	5969.31	-855413	698918	-2917.52	270.22	4296.85	4666.27	1613.79	522.44	-7367.52	26646.5	-1747.88	629.53
1	3373.42	4537.31	5223.19	3400.4	6814.46	-58992.1	471822	-2953.23	424.16	2298.23	4774.31	1478.39	360.61	-6916.75	16420.3	-1562.09	915.88
1	3393.74	4393.57	5052.2	3248.77	6200.71	-172902	492449	-3020.72	171.25	1295.23	5154.91	1561.15	454.7	-7903.14	17217.5	-822.18	2424.8
1	3414.06	4749.53	4861.83	3009.27	5860.83	-119477	303742	-3028.58	294.87	3485.27	5226.64	1521.17	333.73	-7430.28	16488.9	-666.57	3699.29
1	3434.39	4692.32	4824.09	3315.15	6294.91	195149	229824	-2636.57	218.9	2191.17	5153.02	1470.28	332.11	-6960.27	11252.2	-2324.95	1414.28
1	3454.71	4513.17	4388.28	3456.2	6958.84	743441	609904	-2834.22	548.36	3443.2	5680.52	1426.32	324.78	-6981.1	14701	9364.48	10714.3
1	3475.03	4571.05	4744.51	3492.51	6969.06	457774	411907	-2625.56	267.04	1362.6	5441.31	1592.78	448.32	-7575.86	18361.7	7577.28	6496.9
1	3495.35	4368.76	4479.77	3228.4	6307.31	-56926.7	527975	-2962.47	311.45	3126.78	4356.47	1576.66	399.71	-8653.46	16635.6	-2438.06	10128.6
1	3515.67	4487.94	4411.74	2976.33	6096.32	311365	483741	-2798.99	367.41	4001.77	5137.45	1479.32	408.77	-8233.48	17329.5	2070.38	1817.37
1	3535.99	4453.57	4352.53	3631.97	6793.27	381025	156604	-2919.72	211.64	3709.29	5192.82	1533.84	493.06	-8070.16	21469.4	-686.29	543.41
1	3556.31	4572.63	4483.96	3307.21	6785.53	-447523	210723	-2919.99	488.81	3033.48	4709.53	1328.73	291.64	-7507.32	12947.1	7440.54	3220.34
1	3576.63	4516.96	4654.93	3038.7	5933.07	758957	578426	-2866.26	339.62	4386.23	5283.88	1440.86	265.35	-7372.28	15196	12076.9	13896.8
1	3596.96	4579.53	6140.37	3210.53	6571.77	-45694	504336	-3181.9	341.13	2720.45	5401.78	1452.72	547.79	-6832.38	20118.9	-305.49	3067.12
[truncated: 30 more columns]
