# Supplementary material for: Comparative Room Burn Study of Furnished Rooms from the United Kingdom, France and the United States
Source: Springer Nature journal article supplement (doi:10.1007/s10694-019-00888-8), 2019-07-16
Supplement: MOESM14 [file 16938730]

## Sheet: 18-318ACC-GB3Door
Version=1
NumMeasures=000177
NumComponents=8
Usage=0
SystemID=
Title=Linked spectrum at 0.341 min.
Description=
NumMethods=1
MethodNumComponents1=8
MethodTitle1=PRis	All gases except NO 2016
NumLimits=0008
UseLimit=0	0	0	0	0	0	0	0
LowerLimit=0.000	0	0	0	0	0	0	0
UpperLimit=0.000	0	0	0	0	0	0	0
StartTime=06Feb36002816
EndTime=06Feb36012813
DataTable
Sequence	Time	CO2	(+)CO2	CO	(+)CO	HCl	(+)HCl	HF	(+)HF	SO2	(+)SO2	NO2	(+)NO2	HBr	(+)HBr	HCN	(+)HCN
		ppm	(+)ppm		ppm	(+)ppm	ppm	(+)ppm		ppm	(+)ppm	ppm	(+)ppm	ppm	(+)ppm		ppm	(+)ppm	ppm	(+)ppm	ppm	(+)ppm	ppm	(+)ppm		ppm	(+)ppm	ppm	(+)ppm	ppm	(+)ppm	ppm	(+)ppm	ppm	(+)ppm		ppm	(+)ppm	ppm	(+)ppm	ppm	(+)ppm	ppm	(+)ppm	ppm	(+)ppm	ppm	(+)ppm
1	20.46	35.01	288.97	12.32	15.52	-228.7	473.4	11.17	23.22	-10.21	32.76	-4.7	83.11	-24.93	147.23	-13.21	2.01
1	40.78	39.07	312.68	1.68	13.77	-147.33	1107.82	9.03	15.69	-13.83	19.36	-5.59	82.61	-15.39	61.4	-22.6	11.9
1	61.1	30.1	318.58	12.51	4.55	48.12	160.07	10.47	17.17	-9.65	19.85	-7.03	83.4	-13.84	98.22	-10.64	3
1	81.43	23.11	306.73	1.69	17.63	-135.27	787.85	13.5	28.87	-36.16	13.77	-5.94	85.75	-8.98	90.84	-23.11	6.53
1	101.75	34.07	236.67	12.75	4.46	830.65	594.14	7.76	11.23	-22.81	24.93	-3.92	86.11	-18.67	240.64	-23.98	3.51
1	122.07	52.16	312.59	-7.13	39.62	-91.5	585.13	8.55	8.56	1.4	26.07	-2.85	89.56	-9.22	118.01	-35.83	14.61
1	142.4	39.75	253.76	0.01	35.14	-364.87	612.89	8.96	17.28	-11.05	32.5	-3.92	87.83	-24.01	242.26	-19.68	6.65
1	162.72	85.35	156.63	-5.05	26.64	232.41	344.3	4.63	9.55	-9.17	25.42	-0.74	95.44	-7.72	191.31	-26.91	8.76
1	183.04	207.16	309.8	8.59	7.1	247.12	555.13	9.64	18.72	-27.15	27.8	-5.1	87.37	-6.84	125.4	-16.84	1.94
1	203.37	312.39	446.99	6.22	17.9	45.46	402.88	13.57	13.13	-4.37	18.96	-2.62	88.33	-2.64	156.34	-30.86	7.06
1	223.69	586.53	828.52	8.14	18.29	71.05	200.72	4.08	24.28	-15.77	21.33	-4.36	88.29	-21.43	106.8	-17.29	1.32
1	244.01	995.62	872.21	12.73	24.49	-722.59	688.54	6.92	16.6	-47.86	24	-2.81	87.2	-26.19	86.32	-27.42	4.16
1	264.34	1381.13	643.18	-2.45	38.83	-275.11	448.01	16.42	6.85	-24.92	12.81	-3.69	85.45	-17.69	153.16	-25.14	8.15
1	284.66	1613.68	521.91	23.11	6.09	4.23	349.21	18.02	16.3	-20.35	14.59	-8.59	80.28	-16.85	142.82	-21.44	10.47
1	304.99	1973.1	818.53	31.01	4.74	758.61	619.09	7.73	13.69	-25.51	27.94	-4.45	80.95	-17.54	127.29	-14.39	7.58
1	325.31	2147.72	954.88	49.41	15.32	613.08	260.1	14.72	25.26	-4.11	20.25	-6.93	79.52	-7.88	103.24	-14.94	2.94
1	345.63	2292.47	1206.95	68.09	42.33	672.92	424.35	8.12	23.78	-33.06	32.87	-3.73	82.86	-7.93	133.88	-8.7	9.79
1	365.95	2561.06	1741.26	69.81	29.88	286.79	435.17	21.97	28.02	12.24	19.79	-6.93	81.22	-6.89	148.31	-14.22	8.07
1	386.28	2764.73	1964.87	87.13	40.55	311.74	235.43	6.21	12.86	-43.22	32.05	-5.41	81.53	-6.17	106.33	-21.44	16.98
1	406.6	2876.35	2438.92	119.61	58.04	636.1	623.47	18.3	27.77	-13.16	23.89	-4.22	81.7	-13.15	169.21	-12.91	5.96
1	426.92	2950.42	2460.95	114.6	44.39	465.72	345.53	-1.62	14.98	5.24	14.26	-3.37	82.32	-12.33	226.68	-14.61	18.17
1	447.25	2926.9	2595.34	143.15	63.74	-350.43	448.98	13.02	10.3	-15.04	15.54	-6.31	83.59	-4.72	132.89	-24.63	8.28
1	467.57	3012.72	2695.82	174.92	75.46	245.2	257.91	17.96	30.96	3.21	22.08	-5.14	84.49	-3.91	232.88	-17.7	10.47
1	487.89	3276.28	3312.74	235.36	111.04	211.96	484.23	12.58	13.18	-6.51	31.32	-4.98	83.2	-8.97	222.44	-19.92	15.02
1	508.21	3344.85	3197.02	233.72	84.89	1228.1	277.39	14.04	4.85	-21.2	15.23	-7.07	80.77	-9.3	178.53	-16.85	17.35
1	528.54	3108.01	2694.8	225.86	99.1	352.39	834.56	10.75	17.19	-13.21	20.59	-4.42	83.73	-15.21	166.12	-20.62	12.83
1	548.86	3186.08	2948.01	227.64	75.33	-467.7	470.45	28.11	12.1	-41.02	32.52	-6.05	86.17	-11.15	147.72	-14.8	11.72
1	569.18	3179.04	2642.78	243.38	94.83	1505.54	1124.78	0.92	22.05	-16.95	30.85	-4.99	86.74	-15.17	140.04	-12.84	22.22
1	589.51	3176.06	2981.11	245.13	80.07	618.13	828.58	8.57	22.07	-10.7	18.09	-3.13	88.27	-3.49	132.2	-16.6	14.66
1	609.83	3568.3	3553.22	261.57	94.76	47.89	603.54	9.53	3.88	-23.37	30.18	-3.57	86.21	-11.59	138.17	-16.58	8.62
1	630.15	4779.01	7675.53	273.03	95.7	-314.73	319.83	8.72	8.29	-16.28	20.8	-6.1	80.52	-3.07	264.24	-13.12	20.97
1	650.48	6238.32	9307.7	284.64	104.86	358.03	249.73	26.39	10.23	-25.93	26.05	-2.67	76.5	-3.7	176.87	-12.12	18.27
1	670.8	7264.24	10604.5	305.38	103.45	-99.76	276.82	14.68	19.67	-12.22	17.61	-5.77	62.81	-15.5	163.93	-11.31	20.63
1	691.12	8148.03	12689.9	294.87	106.74	94.8	763.33	7.29	10.49	-18.81	31.23	-3.53	58.58	2.11	141.3	-8.77	17.24
1	711.44	9258.45	18933.8	286.69	90.29	141.31	462.42	10.46	18.82	-26.01	18.66	-4.08	53.35	-20.5	127.07	-7.56	19.58
1	731.77	9733.63	20501.7	328.24	141.3	766.66	262.64	8.58	9.8	-24.16	25.03	-4.76	48.27	-11.23	145.09	-6.55	20.62
1	752.09	15701.6	266011	330.57	149.85	901.09	298.22	15.07	14.1	-18.21	16	-4.71	36.75	2.42	149.39	-3.58	4.97
1	772.41	35106	22062.8	356.7	136.29	819.85	426.78	18.39	18.61	-10.34	17.82	-1.92	30.34	-13.24	122.53	-7.14	5.39
1	792.74	7473.82	265592	407.7	120.07	122.71	258.14	16.87	11.75	-8.39	26.17	-3.85	23.14	-15.14	189.11	2.52	18.06
1	813.06	-5922.16	71529.3	531.2	122.5	646.78	388.27	12.81	16.08	-22.61	35.75	-6.69	17.68	-9.4	117.65	-2.64	15.3
1	833.38	11157.5	21520.2	562.36	84.33	476.83	490.98	16.42	11.97	-48.05	18.97	-7.26	17.59	0.49	192.41	-4.26	17.4
1	853.7	9224.17	18252	592.42	93.79	1337.82	1000.2	14.89	18.69	11.24	25.22	-4.85	22.2	-18.37	156.21	1.41	23.79
1	874.03	8881.9	23529.3	626.43	99.68	878.66	1247.72	7.33	18.14	-32.13	21.35	-5.69	24.22	-6.85	191.82	3.3	24.08
1	894.35	8264.72	16959.6	662.79	97.71	194.83	593.45	11.18	18.92	-10.87	20.41	-4.99	27.71	-9.96	123.99	-6.27	28.36
1	914.67	7572.82	17213.4	661.36	92.95	904.01	957.28	15.63	23.55	-19.69	34.43	-3.71	32.73	-1.72	188.83	-1.01	22.93
1	934.99	8501.84	13143.9	612.82	75.98	448.13	502.12	21.53	19.95	-30.09	14.75	-4.96	35.41	-19.83	120.27	-1.83	23.94
1	955.32	8920.18	15458.6	627.54	110.3	330.69	382.56	19.02	12.28	-7.57	25.21	-2.36	39.36	-11.74	227	5.54	20.8
1	975.64	8016.6	21288.2	605.95	91.7	1160.13	613.53	13.05	17.04	2.02	21.89	-2.87	41.42	-6.46	174.6	0.67	22.24
1	995.96	10034.9	18748.5	655.04	81.99	902.04	724.02	16.09	10.37	-7.75	25.33	-2.73	41.34	-12.9	194.45	-10.08	27.63
1	1016.29	9034.75	17688	676.21	77.1	253.65	291.49	13.18	32.1	-28.36	38.41	-4.98	37.2	-14.25	198.37	7.22	18.84
1	1036.61	5843.03	215158	738.22	91.05	326.05	1525.9	14.17	10.45	-14.67	23.91	-6.42	29.83	-0.46	137.18	-1.35	30.63
1	1056.93	46035.3	364849	848.27	96.03	1584.93	2022.58	20.85	20.66	-18.75	23.09	-6.43	25.57	-2.66	155.84	-4.71	35.85
1	1077.26	28881.8	142679	947.35	110.33	1105.17	2425.84	9.78	20.17	-14.4	21.08	-2.86	23.06	-6.78	136.22	15.84	30.79
1	1097.58	35106	22062.8	933.81	117.75	1803.13	2851.45	13.54	20.13	-37.6	29.41	-4.14	14.74	-15.44	224.76	8.45	33.73
1	1117.9	35106	22062.8	951.29	110.85	1488.74	2525.29	16.31	10.93	-17.87	15.9	-4.88	8.71	-6.19	200.65	8.77	40.53
1	1138.23	35106	22062.8	977.42	119.73	1642.3	2415.62	8.44	9.6	-28.6	24.36	-3.8	7.98	-1.88	96.43	20.8	53.37
1	1158.55	35106	22062.8	1014.72	123.8	1291.59	2017.83	12.02	10.75	-35.56	19.04	-1.92	9.3	-12.77	145.81	10.9	44.38
1	1178.87	35106	22062.8	1054.78	137.91	677.79	1605.47	15.91	14.58	-13.09	24.36	-4.63	10.48	-14.05	122.03	18.91	51.22
1	1199.19	35106	22062.8	1077.12	160.18	1289.34	2202.08	10.56	5.71	-24.67	23.13	-3.27	14.63	-9.45	142.96	34.74	47.42
1	1219.52	35106	22062.8	1151.61	175.13	1024.47	2239.34	7.65	15.12	-29	19.05	-5.04	19.21	-11.31	107.49	54.29	48.68
1	1239.84	35106	22062.8	1420.07	321.68	591.67	1485.17	14.8	7.27	2.38	19.41	-2.13	24.8	-22.74	186.15	104.61	51.17
1	1260.16	35106	22062.8	2057.18	701.21	1761.39	1678.17	19.45	28.49	-5.29	31.67	5.86	28.06	-6.3	319.62	123.33	58.34
1	1280.49	35106	22062.8	2986.53	1343.15	1924.7	3271.71	19.06	18.94	18.38	15.42	16.45	39.72	-15.55	280.16	124.78	66.89
1	1300.81	35106	22062.8	11964.3	9688.02	24324	81143.4	1.2	10.38	170.34	106.46	30.12	64.63	-32.43	155.58	91.02	419.33
1	1321.13	35106	22062.8	17441.5	16142.5	36158.8	138788	7.16	22.88	597.52	182.95	34.59	158.96	-59.75	279.18	710.38	969.51
1	1341.46	35106	22062.8	15670.3	14111.6	35446.7	140934	-4.37	33.4	746.11	162.13	39.6	322.71	-48.69	516.47	808.89	1374.81
1	1361.78	35106	22062.8	19016.7	18138.3	45446.1	185024	-17.39	32.7	579.15	311.69	54.4	441.49	-58.14	622.67	888.94	2046.01
1	1382.1	35106	22062.8	21606.6	21546.8	50719.2	207392	-28.96	46.52	291.7	403.36	73.47	516.36	-65.63	702.64	1029.72	2201.99
1	1402.42	35106	22062.8	23841.4	24261.3	54949.5	224668	-27.63	51.87	169.71	475.73	89.03	563.93	-71.45	764.64	1043.79	2301.17
1	1422.75	35106	22062.8	14626.9	12555.9	37484.2	149293	-32.11	70.32	56.98	231.66	83.31	643.33	-45.11	556.05	772.2	675.22
1	1443.07	35106	22062.8	9218.87	6675.07	22528.5	86378	-17.36	69.56	165.67	91.58	78.62	686.49	-18.37	278.65	482.93	343.04
1	1463.39	35106	22062.8	9575.76	7096.51	24872.8	96268.5	-13.3	63.97	538.72	90.8	88.22	710.68	-23.37	287.66	405.09	483.84
1	1483.72	35106	22062.8	9556.24	6953.16	25083.7	97779.2	-41.86	75.82	565.59	86.68	105.46	768.69	-47.19	306.08	391.32	336.75
1	1504.04	35106	22062.8	12115.4	7799.22	38748.9	105700	-744.17	143.91	1513.84	1103.14	490.6	1064.17	-1507.55	2793.94	585.23	219.73
1	1524.36	76926.9	224629	12428.3	5367.58	50474.3	98365.9	-1663.66	243.78	2736.42	2444.11	919.42	1132.6	-3464.17	6500.41	724.44	29.33
1	1544.68	35106	22062.8	15442.4	6687.32	61591.1	108850	-2182.42	260.95	3403.26	3542.38	1264.27	1171.98	-4868.67	9785.76	608.75	154.05
1	1565.01	178.72	316761	16932.1	5017.67	116211	179300	-2636.95	355.19	3708.07	4785.74	2053.25	1466.78	-6646.8	13187.9	851.3	279.03
1	1585.33	26855.5	97986.6	15451.3	4143.23	91300.8	119616	-2466.97	272.82	3710.61	4642.55	1721.5	1084.1	-6499.29	12713.1	481.61	217.68
1	1605.65	59915.6	105949	8057.65	5238.26	82102.2	186372	-2496.43	268.03	5422.17	4651.07	1987.22	1294.21	-6543.51	12991.7	659.65	327.89
1	1625.97	70903.7	268150	9597.46	4140.56	167915	187047	-2546.76	343.89	5915.17	4833.83	1962.71	1322.59	-6481.78	12947.6	660.18	322.43
1	1646.3	87930.6	133508	15314.4	3520.93	38799.8	162974	-2478.3	376.46	4779.77	4723.22	1997.97	1274.55	-6573.72	13311.8	591.68	198.43
1	1666.62	39289.4	349881	15618.6	3707.94	82275.8	140475	-2773.61	280.78	5374.05	5073.14	2339.09	1469.86	-7143.01	13414	722.49	260.57
1	1686.94	49738.8	327609	14013.5	3291.33	69918.1	298242	-2741.82	300.91	5310.16	4950.88	2034.17	1331.39	-6902.87	12908.2	631.68	296.28
1	1707.27	24929.5	133515	12769.6	3304.5	90412.9	132863	-2807.59	303.88	4707.82	4863.56	2114.21	1307.75	-6817.8	13222.5	785.95	118.83
1	1727.59	-15574.4	183103	11951.7	3521.23	33028.6	109955	-2799.8	291.38	4656.99	5035.93	2143.14	1296.09	-7051.22	14057.9	628.53	277.76
1	1747.91	85772.2	209253	9282.5	4978.07	206679	157132	-2824.52	285.9	4405.07	4944.1	2039.2	1221.39	-7070.3	13503.3	691.39	338.63
1	1768.23	35106	22062.8	5508.77	7005.36	46513.4	111371	-2810.71	290.38	4460.66	4950.61	2069.06	1234.28	-6930.94	13811.3	596.47	371.14
1	1788.56	42172.9	157907	4794.38	7316.46	225532	190677	-2766.34	310.82	4397.3	4968.5	2055.93	1187.05	-6947.45	13634	499.08	398.51
1	1808.88	35106	22062.8	4795.16	7417.53	-60754.7	211440	-2843.75	319.12	4290.24	5002.75	2120.17	1264.23	-7038.73	13960.6	518.08	423.94
1	1829.2	35106	22062.8	4466.26	7516.09	2330.93	175722	-2719.91	384.32	4508.25	4855.48	2028.23	1183.35	-6947.85	13350.6	606.42	432.23
1	1849.53	29313.6	269048	3971.67	7462.9	69142.1	334502	-2727.24	358.33	4207.53	4832.33	2021.82	1120.94	-6898.3	13390.6	510.81	360.87
1	1869.85	59857.6	265845	3753.11	7415.79	146417	113365	-2717.69	289.85	4034.87	4871.35	1962.42	1108.28	-6864	14136.9	429.72	392.49
1	1890.17	-25085.1	137005	3723.6	7504.99	150540	263577	-2770.43	247.99	3735.49	4922.01	1991.63	1240.34	-6938.31	13666	568.98	520.18
1	1910.5	18227.5	225440	3761.12	7580.43	-115116	232008	-2714.67	358.84	3352.01	4883.48	2004.71	1111.39	-6898.93	13419.1	505.74	484.34
1	1930.82	18103.4	68752.8	3626.73	7327.91	-33961.8	204832	-2785.72	327.31	3600.5	4828.04	1937.1	1054.36	-6861.75	12992	425.07	442.44
1	1951.14	64668.2	295189	3579.51	7197.35	-3818.88	154589	-2709.88	304.05	3650.46	4808.39	1922.65	991.55	-6890.64	13079	394.59	393.29
1	1971.47	62639.6	117915	3595.37	7175.73	245502	195737	-2666.42	256.3	3488.17	4854.46	1880.52	949.91	-6817.98	13492.5	394.87	538.73
1	1991.79	-167.66	162786	3528.03	7048.56	181203	137971	-2785.36	282.32	3423.41	4633.69	1887.56	892.23	-6822.9	13246	456.64	356.65
1	2012.11	-9399.63	255722	3557.48	7042.11	-145251	131915	-2771.74	310.78	3277.98	4771.2	1848.47	853.03	-6799.48	13995.3	375.75	401.45
1	2032.43	35106	22062.8	3639.94	7037.29	-89686.2	231181	-2758.14	328.88	3425.13	4802.5	1856.92	873.72	-6826.98	13794.3	364.93	363.76
1	2052.76	19442.2	28808	3637.73	7201.68	-27625.9	105069	-2734.74	343.52	3498.59	4776.67	1859.96	895.5	-6877.33	13071.4	424.06	416.11
1	2073.08	54701.4	136839	3768.37	7315.36	-86449.8	275521	-2726.48	305.4	3292.51	4730.92	1850.58	866.87	-6811.57	13546.5	365.78	407.28
1	2093.4	24703.2	57384	3730.08	7163.86	155941	182055	-2715.77	237.56	3497.47	4755.57	1824.07	845.07	-6899.11	13815.5	353.34	500.08
1	2113.73	-8899.96	308159	3958.83	7050.39	80333.9	206694	-2738.26	319.49	3322.2	4796.89	1857.79	778.53	-6843.03	12871.3	199.52	383.79
1	2134.05	-22508.2	170928	4329.04	6893.04	58735.3	438830	-2741.61	172.43	3328.52	4786.58	1799.19	782.13	-6762.82	13296	367.87	465.51
1	2154.37	24998.4	302659	4889.39	6957.9	57672.9	236380	-2734.3	189.41	3095.77	4735.45	1805.39	743.95	-6796.72	13323.5	337.01	470.93
1	2174.7	40122.4	256184	5247.68	6626.44	206902	180305	-2691.76	257.88	3233.71	4798.29	1792.27	742.85	-6855.03	13261.7	274.8	397.82
1	2195.02	38359.1	150225	5142.27	6584.99	-70126.3	119551	-2773.49	247.5	3390.35	4740.19	1798.78	678.15	-6873.05	13381.3	284.23	456.36
1	2215.35	38049.7	69750.8	5953.81	6250.78	-133366	161394	-2686.31	230.84	3184.21	4797.81	1799.32	690.03	-6875.52	13363.9	287.93	407.09
1	2235.67	47208.1	81933.6	5669.39	6205.23	-93169.9	275467	-2696.54	248.5	3271.96	4822.14	1808.8	624.18	-6782.03	13449.5	304.71	386.1
1	2255.99	81161.8	230727	5557.84	6271.97	108680	249372	-2764.65	218.48	3418.67	4900.63	1816.95	611.75	-6753.27	13404.6	224.93	324.81
1	2276.32	-19484	218498	5835.38	6312.76	-181312	307163	-2734.59	329.14	3207.71	4859.8	1818.94	629.44	-6844.7	13688.2	286.33	387.05
1	2296.64	65567.4	311020	5621.48	6441.55	-87450.6	163010	-2724.95	201.64	3476.94	4667.73	1812.54	592.17	-6862.29	13445.6	250.46	372.35
1	2316.96	47766.7	344599	5206.3	6503.49	-65248.7	109549	-2718.92	254.01	3272.43	4795.85	1793.51	555.6	-6881.53	13630.6	173.79	391.25
1	2337.29	74942.3	241223	4979.86	6593.14	-35402	127284	-2631.29	243.99	3150.35	4847.19	1796.91	516.29	-6768.75	13409.8	270.82	401.45
1	2357.61	52450.7	305492	4796.78	6546.54	146331	261535	-2758.62	260.03	3191.11	4837.46	1787.17	494.09	-6857.08	13465.1	157.64	433.6
1	2377.93	89928	202065	4697.23	6579.6	-117537	154684	-2747.95	284.17	3264.95	4834.52	1787.21	500.37	-6782.12	13270.4	286.67	464.7
1	2398.25	82952.8	248744	4652.12	6640.72	-37706	198904	-2720.78	287.26	3317.83	4855.29	1775.39	502.94	-6861.5	13134.4	183.54	453.23
1	2418.58	38225.7	313142	4523.91	6648.04	106311	341790	-2700.51	268.3	3098.35	4870.83	1801.63	445.45	-6829.47	13592	223.17	439.12
1	2438.9	-22255.8	236611	4446.01	6617.29	-157994	196809	-2768.14	239.27	3194.22	4823.34	1806.29	409.84	-6748.64	13852.2	261.64	428.52
1	2459.22	365	256750	4514.73	6838.11	43617.9	203332	-2603.61	252.63	3278.13	4757.24	1770.46	450.43	-6854.93	13645.2	203.99	456.96
1	2479.55	11526	249618	4386.24	6768.79	31373.3	150508	-2666.76	196.83	3327.87	4853.92	1767.39	423.5	-6798.94	13641.2	144.27	383.49
1	2499.87	68869.9	266265	4294.93	6609.42	12477.8	140102	-2753.59	287.14	3302.8	4766.73	1746.15	426.49	-6943.3	13041.8	171.7	447.35
1	2520.2	23367	239361	4231.3	6583.99	14920.4	155429	-2768.29	211.36	3137.88	4848.19	1792.81	372.28	-6884.51	13220.6	83	328.07
1	2540.52	-29125	185455	4354.1	6786.37	-39469.9	361782	-2740.84	132.8	3412.12	4835.93	1786.83	350.83	-6782.99	13522.9	246.88	401.76
1	2560.84	28328.8	241874	4196.39	6695.67	56422.8	185136	-2603.72	225.56	3128.06	4955.72	1778.43	352.38	-6921.72	13802.9	269.05	508.95
1	2581.17	57411.2	272760	4242.91	6742.56	131504	150160	-2739.51	252.84	3293.97	4842.17	1767.35	334.91	-6897.49	13624.6	219.47	404.49
1	2601.49	-29225.1	257330	4327.48	6765.45	114057	407037	-2737.3	237.71	3417.07	4784.96	1815.1	283.99	-6935.9	14012.6	189.66	409.03
1	2621.81	41800.2	207682	4325.3	6793.91	32416.7	186029	-2647.65	202.86	3459.02	4839.5	1778.24	313.27	-6837.01	13500.8	265.1	372.29
1	2642.14	5344.37	4645.29	3376.62	6565.29	244921	174671	-2708.67	291.34	3246.85	4893.99	1771.28	232.3	-6850.18	13710.6	127.05	404.78
1	2662.46	4419.74	4311.31	3312.39	6411.12	-30479.3	172752	-2762.98	247.97	3331.98	4831.25	1771.32	340.62	-6871.51	13735.2	178.06	565.7
1	2682.78	4408.83	4210.47	3323.51	6371.99	213606	125550	-2708.69	171.21	3508.46	4831.4	1764.15	354.47	-6995.44	13505.8	-9.42	414.33
1	2703.11	4417.23	4212.97	3341.94	6451.41	-14313.7	171479	-2628.29	216.38	3202.95	4796.9	1772.96	382.96	-6858.42	13235	32.84	518.95
1	2723.43	4396.19	4306.33	3361.43	6414.29	99658.4	289153	-2627.85	259.34	3285.78	4774.99	1781.13	377.25	-6877.55	13890	39.98	463.29
1	2743.75	4367.23	4122.21	3260.1	6407.97	-47773.2	123145	-2710.34	206.52	3140.09	4986.49	1793.87	396.28	-6866.8	14108.8	77.24	426.39
1	2764.07	4391.93	4178.04	3345.96	6518.93	49009.7	183757	-2663.34	202.96	3273.75	4910.83	1783.03	406.52	-6755.96	13286.1	77.77	490.77
1	2784.4	4432.84	4174.61	3352.85	6445.78	-19933.6	145337	-2701.3	222.67	3238.14	4800.27	1788.49	406.23	-6949.07	13597.5	111.29	450.55
1	2804.72	4440.86	4341.57	3276.38	6341	322754	145784	-2643.23	210.85	3226.66	4867.81	1785.81	398.18	-7045.9	13464.6	5.14	480.33
1	2825.04	4453.71	4373.88	3365.62	6450.93	63688.5	232321	-2624.89	267.21	3271.16	4856.33	1782.37	396.83	-6944.5	13926.5	118.38	469.67
1	2845.37	4402.14	4249	3229.51	6312.84	120113	199214	-2730.6	187.5	3257.6	4874.43	1776.05	385.93	-6875.8	14330.5	45.75	411.17
1	2865.69	4438.3	4316.91	3316.81	6440.15	6758.04	251428	-2695.29	216.04	3283.26	4930.54	1775.66	400.24	-6823.28	13822.1	119.11	482.02
1	2886.01	4454.67	4425.86	3420.92	6549.31	-62103.2	178422	-2687.22	233.89	3402.93	4802.42	1768.56	383.09	-6784.74	13693.4	56.01	478.02
1	2906.34	4484.42	4347.84	3255.82	6394.74	36826.1	205281	-2633.32	219.8	3339.79	4841.2	1782.3	410.11	-6826.07	13088.3	91.54	424.39
1	2926.66	4523.71	4374.03	3261.55	6347.07	91767.5	111614	-2703.21	219.92	3280.8	4851	1799.18	416.26	-7002.9	13366.9	25.83	481.32
1	2946.98	4483.09	4291.05	3271.92	6362.7	55928.5	192230	-2651.29	284.56	3381.5	4843.8	1811.71	408.48	-6988.34	13305.9	85.17	458.76
1	2967.31	4508.23	4334.13	3260.02	6351.54	304892	202903	-2583.64	213.52	3408.48	4856.11	1798.17	410.74	-6891.68	13493.2	13.21	474.96
1	2987.63	4474.36	4232.15	3343.34	6410.65	189349	198057	-2627.58	207.28	3180.28	4882.94	1810.74	418.66	-6955.8	13648.5	135.12	430.44
1	3007.95	4490.8	4383.88	3334.77	6447.19	166151	153011	-2640.73	255.03	3124.35	4962.07	1787.74	422.95	-6916.89	14036.4	11.92	344.95
1	3028.27	4497.69	4302.97	3367.49	6568.38	69663.1	214768	-2678.62	154.04	3370.6	4882.06	1807.3	418.06	-6914.68	13054.3	66.73	443.37
1	3048.6	4509.34	4325.54	3454.52	6648.55	268257	193351	-2593.84	191.24	3253.16	4985.19	1795.61	423.43	-6907.94	13549.5	27.33	412.7
1	3068.92	4542.85	4422.88	3367.44	6466.89	166528	177783	-2690.06	177.97	3237.4	4970.71	1798.62	417.3	-6950.75	13896.5	126.1	472.16
1	3089.24	4512.66	4398.43	3385.86	6556.4	66012.7	158697	-2578.45	245.15	3256.28	4874.86	1795.7	418.6	-7005.14	13364.7	-8.33	447.29
1	3109.56	4497.23	4143.12	3343.74	6616.98	-25209.4	202618	-2692.46	185.55	3223.48	4907.12	1786.57	416.71	-6887.08	13828.9	105.02	434.59
1	3129.89	4549.12	4405.23	3369.77	6499.86	103453	169211	-2594.49	275.84	3433.44	4854.92	1790.47	408.21	-7049.18	13984.5	9.65	432.06
1	3150.21	4544.77	4413.27	3406.07	6636.98	240034	260980	-2596.1	233.74	3312.65	5045.53	1808.11	412.58	-6982.07	13732.6	86.65	387.87
1	3170.53	4553.5	4308.33	3440.32	6515.06	21997.3	207373	-2721.09	170.54	3247.39	4905.52	1789.37	411.21	-6968.56	13914.6	96.54	447.46
1	3190.86	4531.98	4377.1	3497.01	6640.97	48372.3	286082	-2647.63	195.82	3404.99	4928.65	1781.39	401.35	-6979.09	13254.5	57.8	433.33
1	3211.18	4564.28	4416.02	3336.29	6530.1	195679	153309	-2702	165.57	3518.67	4964.92	1811.2	431.73	-6988.21	13243.3	47.95	469.59
1	3231.5	4536.74	4370.03	3378.04	6402.25	-46240.5	129808	-2736.79	165.81	3373.78	5031.21	1824.42	436.34	-6989.23	14195.5	40.62	564.99
1	3251.83	4560.78	4325.53	3452.73	6605.19	-158212	64049.9	-2643.36	228.76	3388.54	4980.58	1821.6	437.97	-6977.37	13388.6	8.01	502.55
1	3272.15	4553.81	4224.71	3428.4	6594.2	-107561	315557	-2699.76	269.16	3302.16	4983.22	1809.95	422.43	-6856.45	13480.2	-3.81	437.66
1	3292.47	4533.55	4262.6	3372.7	6557.64	68857.7	240143	-2663.49	219.32	3274.66	4954.46	1798.36	421.49	-6979.59	14130.4	5.64	459.57
1	3312.8	4579.24	4362.21	3356.38	6521.57	97891.9	188005	-2644.83	238.56	3322.23	4961.04	1816.66	425.33	-6886.51	14031	-60.84	400.98
1	3333.12	4580.29	4383.38	3348.25	6536.47	-5634.47	190713	-2650.87	258.25	3375.15	4947.74	1806.7	407.73	-6963.78	13876.7	97.83	424.82
1	3353.44	4580.74	4345.5	3390.79	6556.07	67094.5	139633	-2656.77	257.71	3404.08	4942.88	1802.63	416.63	-6997.62	13188.5	31.56	489.57
1	3373.77	4584.23	4374.29	3420.76	6606.09	-20469.7	200659	-2647.86	244.47	3394.8	4930.79	1815.44	426.87	-6931.23	13977	80.05	489.29
1	3394.09	4591.94	4340.03	3464.29	6553.3	-197780	167001	-2754.27	138.15	3299.66	4925.39	1830.05	432.97	-6966.76	14315.8	47.97	469.29
1	3414.41	4590.7	4350.04	3514.19	6617.98	-105331	91354.1	-2608.43	260.95	3462.12	4902.11	1808.46	423.25	-7001.89	13524.4	56.05	414.72
1	3434.74	4580.14	4335.48	3486.4	6687.91	113431	183509	-2686.97	178.49	3370.64	4993.85	1801.02	419.44	-7009.14	13612.9	40.2	405.76
1	3455.06	4626.96	4569.15	3354.92	6525.4	106136	91899.8	-2683.31	204.94	3388.28	4874.84	1816.81	426.67	-7062.3	13856.5	55.28	446.2
1	3475.38	4585.24	4286.61	3459.89	6547.98	43894.4	184406	-2653.71	188.15	3226.3	5022.73	1811.54	417.48	-6962.32	13638.4	44.59	488.57
1	3495.7	4614.75	4420.4	3466.25	6628.68	78527.8	169205	-2689.57	222.35	3146.79	5029.71	1800.55	416.18	-6961.77	13758.2	67.74	462.59
1	3516.03	4600.71	4362.74	3454.04	6636.57	149477	130205	-2632.62	221.03	3351.32	4948.31	1809.54	423.7	-7024.97	13770.2	73.41	515.75
1	3536.35	4628.1	4485.14	3408.66	6550.52	29748.3	185426	-2594.22	193.71	3205.71	4942.1	1811.29	422.25	-6976.1	13798	62.29	447.7
1	3556.67	4598.91	4335.21	3457.74	6682.12	74929.7	132194	-2650.35	220.62	3372.03	4998.75	1854.54	455.29	-7085.45	13718	113.73	487.47
1	3576.99	4618.95	4389.18	3437.1	6642.33	-65121.2	147150	-2673.01	245.65	3441.78	4931.43	1804.33	413.55	-7126.3	13663.7	8.76	438.26
1	3597.32	4617.11	4359.94	3391.84	6542.13	52965.7	245419	-2802.04	227.45	3386.17	4969.08	1842.65	434.06	-7030.46	13893.7	79.19	458.67
[truncated: 30 more columns]
